# Supplementary material for: 現代の学校教育の再考契機としての森のようちえんの意義 : 「自然学校としての森のようちえん」を手がかりに (特集 持続可能な社会をめざす自然学校)
Source: Frontiers journal article supplement (doi:10.3389/fpls.2022.1005203), 2014-03-01
Supplement: Presentation_1.PDF [file Presentation_1.PDF]

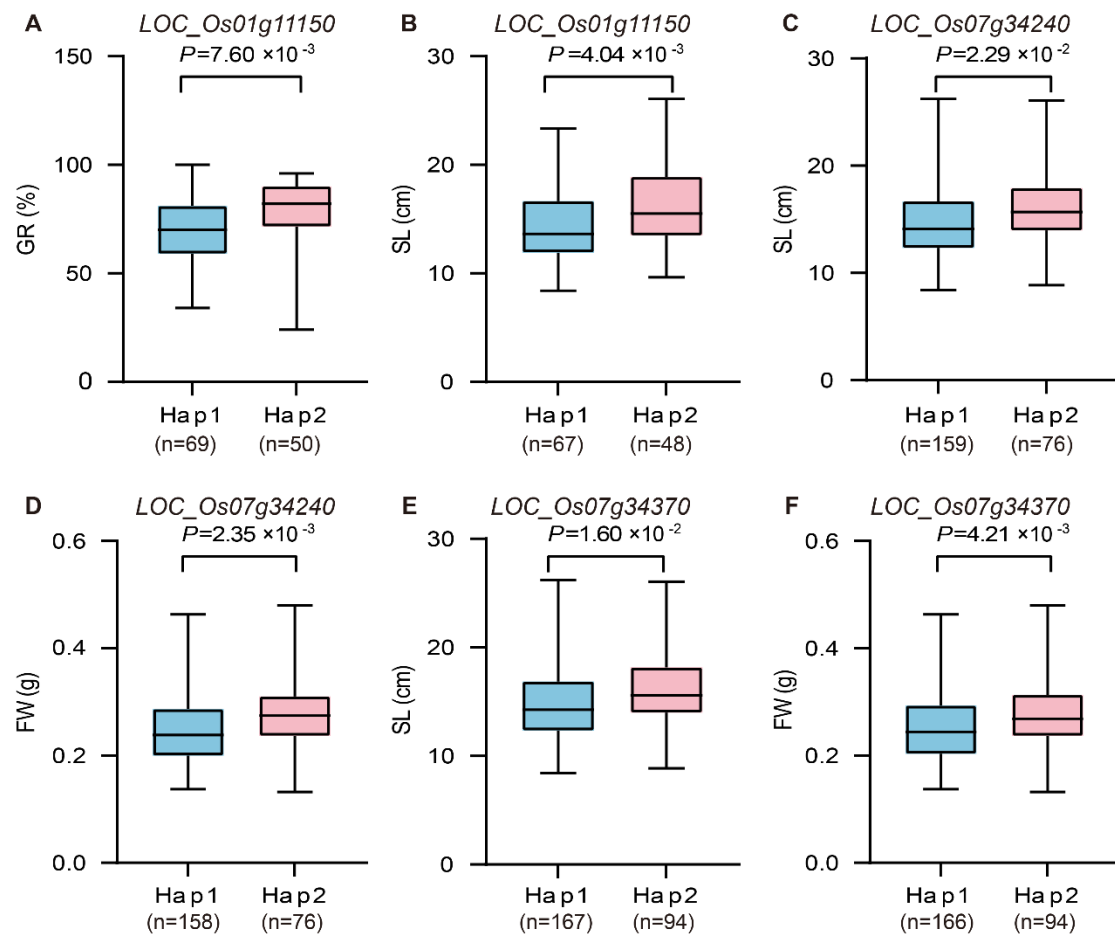

**Supplementary Figure 1** Effects of the *LOC\_Os01g11150*, *LOC\_Os07g34240*, and *LOC\_Os07g34370* on rice SV-related traits

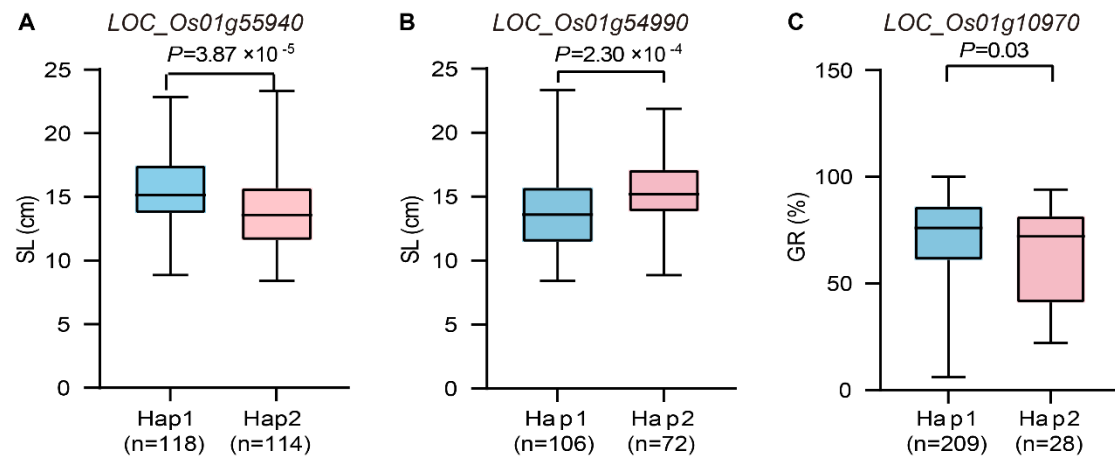

**Supplementary Figure 2** Effects of the *LOC\_Os01g55940*, *LOC\_Os01g54990*, and *LOC\_Os01g10970* on rice SV-related traits

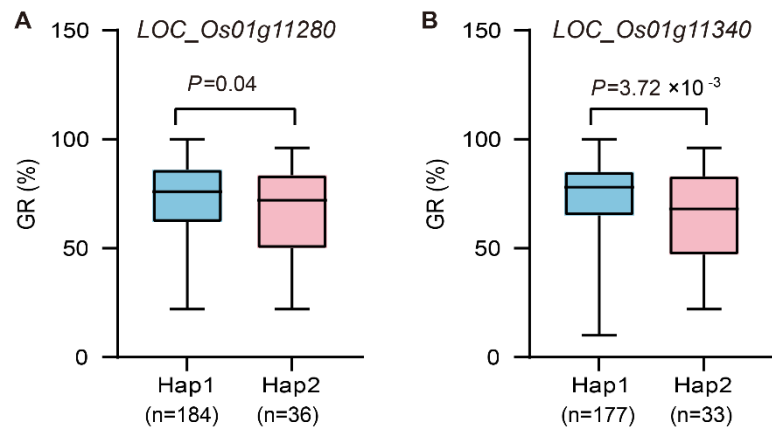

**Supplementary Figure 3** Effects of the *LOC\_Os01g11280* and *LOC\_Os01g11340* on rice SV-related traits

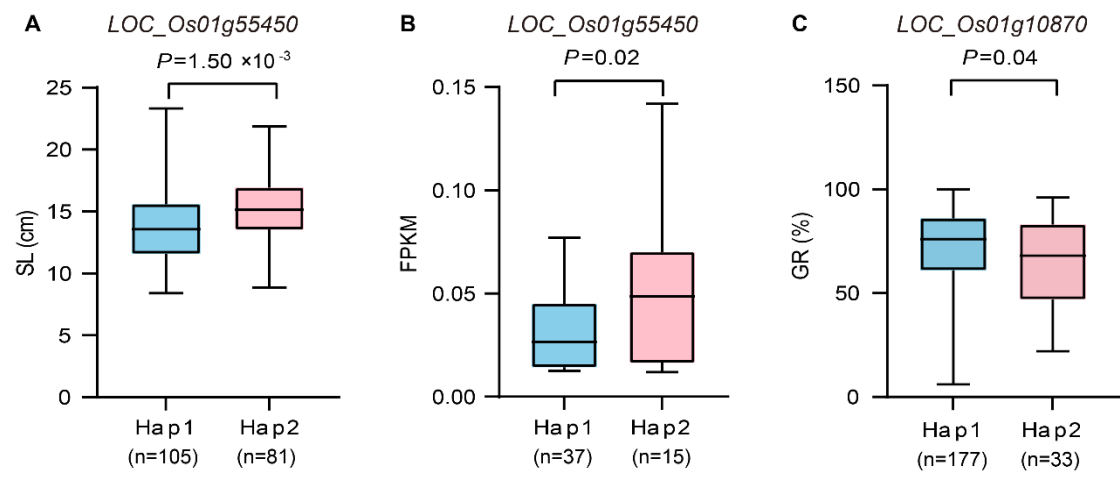

**Supplementary Figure 4** Effects of the *LOC\_Os01g55450* and *LOC\_Os01g10870* on rice SV-related traits

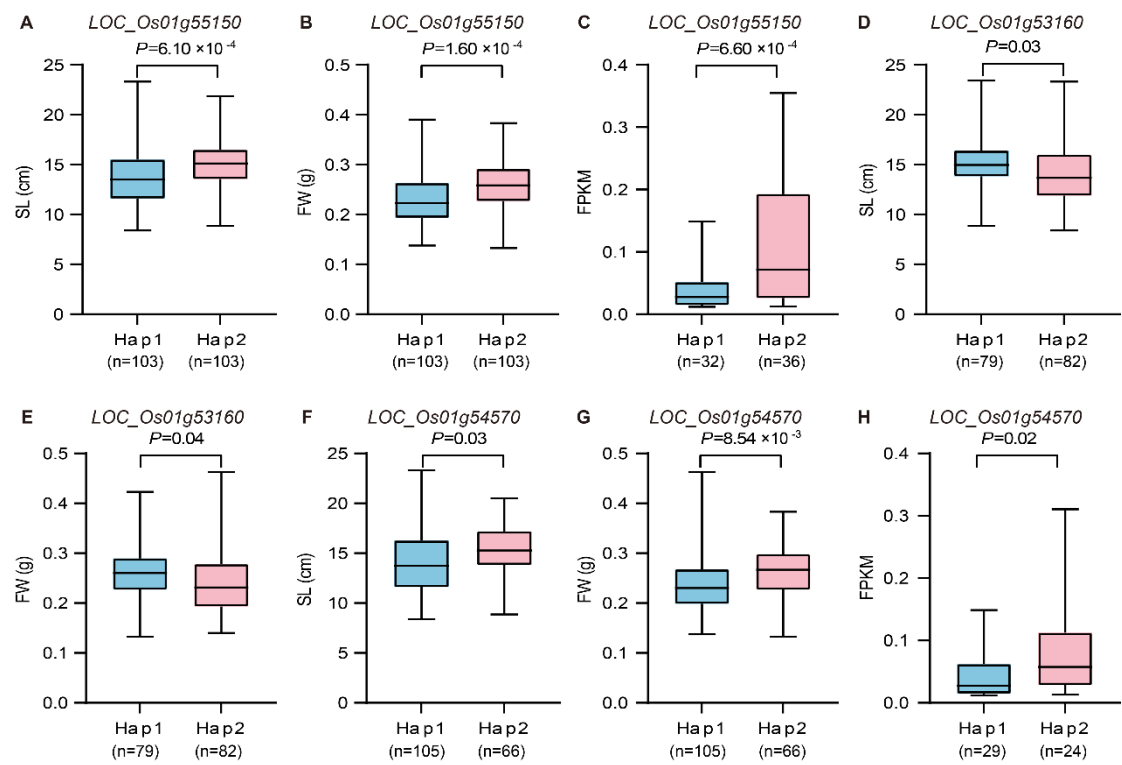

**Supplementary Figure 5** Effects of the *LOC\_Os01g55150*, *LOC\_Os01g53160*, and *LOC\_Os01g54570* on rice SV-related traits
