# Supplementary material for: Genome-wide association study reveals novel QTLs and candidate genes for seed vigor in rice
Source: Front Plant Sci. 2022 Oct 26;13:1005203. doi: 10.3389/fpls.2022.1005203 (PMC9645239; doi:10.3389/fpls.2022.1005203)
Supplement: Supplementary file 1 [file Table_1.xlsx]

## Sheet: Table S1
Supplementary Table 1 Information and phenotypes of 346 accessions used for GWAS.
ID	Sub-population	Origin	Mean of GR (%)	Mean of SL (cm)	Mean of FW (g)	LOC_01g11270	LOC_01g55240		LOC_01g55450		LOC_Os01g10840	LOC_Os01g10870	LOC_Os01g10970	LOC_Os01g10990	LOC_Os01g11960	LOC_Os01g54540	LOC_Os01g54570		LOC_Os01g54990	LOC_Os01g55940	LOC_Os07g34240	LOC_Os07g34370	LOC_Os01g11150	LOC_Os01g11280	LOC_Os01g11340	LOC_Os01g12130	LOC_Os01g24010	LOC_Os01g53160	LOC_Os01g55150		LOC_Os01g11952	LOC_Os01g11300	LOC_Os01g11350	LOC_Os01g55440	LOC_Os04g33870	LOC_Os01g10890	LOC_Os01g10980
						Hap	Hap	FPKM	Hap	FPKM	Hap	Hap	Hap	Hap	Hap	Hap	Hap	FPKM	Hap	Hap	Hap	Hap	Hap	Hap	Hap	Hap	Hap	Hap	Hap	FPKM	Hap	Hap	Hap	Hap	Hap	Hap	Hap
D001	indica	Guangdong, China	88	11.3333	0.253333											Hap1					Hap1	Hap1											Hap2		Hap1		Hap2
D002	japonica	Jiangsu, China	86	15.9333	0.33		Hap1		Hap1		Hap1	Hap1				Hap2	Hap1		Hap1	Hap2	Hap1	Hap1						Hap2						Hap1	Hap1
D003	indica	Anhui, China	86	14.1	0.236667											Hap1					Hap1	Hap1											Hap2		Hap1
D004	japonica	Yunnan, China	86	14.2667	0.33																Hap1	Hap1					Hap1								Hap1
D005	indica	Fujian, China	78	21.3667	0.296667											Hap1			Hap2		Hap1	Hap1											Hap2		Hap1		Hap2
D006	japonica	Guizhou, China	60	10.9	0.1825	Hap1	Hap1	0.132957	Hap1		Hap1	Hap1	Hap1	Hap1	Hap1	Hap2	Hap1	0.0621544	Hap1	Hap2	Hap1	Hap1	Hap1	Hap1	Hap1	Hap2	Hap1	Hap2	Hap1	0.0621544		Hap1	Hap1	Hap1	Hap1	Hap1
D007	indica	Guangdong, China	92	23.1667	0.333333											Hap1					Hap1	Hap1											Hap2		Hap1		Hap2
D008	indica	Jiangsu, China	80	19.5333	0.32	Hap2	Hap2	0.0914644			Hap2		Hap1	Hap2		Hap1				Hap1		Hap2	Hap2	Hap1	Hap1				Hap2	0.20414			Hap1		Hap1	Hap1
D009	indica	Guangdong, China	58	16.9	0.246667											Hap1			Hap2	Hap1	Hap1	Hap1											Hap2		Hap1		Hap2
D010	indica	Guangxi, China	88	14.9667	0.2575	Hap1						Hap1	Hap1	Hap1	Hap2	Hap1				Hap1	Hap2	Hap2			Hap1			Hap1				Hap1	Hap1			Hap1	Hap1
D011	indica	Guangxi, China	48	23.4333	0.286667											Hap1						Hap1						Hap1					Hap2		Hap1		Hap2
D012	indica	Sichuan, China	80	18.9	0.2475	Hap2						Hap1		Hap2						Hap1	Hap2	Hap2	Hap2	Hap1	Hap1		Hap2					Hap1	Hap1	Hap1	Hap1	Hap1
D013	japonica	Heilongjiang, China	66	12.8333	0.206667	Hap1	Hap1		Hap1		Hap1	Hap1	Hap1	Hap1	Hap1	Hap2	Hap1		Hap1	Hap2	Hap1	Hap1	Hap1	Hap1	Hap1	Hap2	Hap1	Hap2	Hap1		Hap1	Hap1	Hap1	Hap1	Hap1	Hap1	Hap1
D014	japonica	Heilongjiang, China	78	11	0.19	Hap1	Hap1		Hap1		Hap1		Hap1			Hap2	Hap1		Hap1	Hap2	Hap1	Hap1				Hap2	Hap1	Hap2	Hap1		Hap1	Hap1	Hap1	Hap1	Hap1	Hap1
D015	japonica	Heilongjiang, China	10	NA	NA	Hap1	Hap1		Hap1		Hap1		Hap1			Hap2	Hap1		Hap1	Hap2	Hap1	Hap1			Hap1	Hap2	Hap1	Hap2	Hap1		Hap1	Hap1	Hap1	Hap1	Hap1	Hap1	Hap1
D016	japonica	Heilongjiang, China	62	13.5	0.17	Hap1	Hap1		Hap1		Hap1	Hap1	Hap1	Hap1	Hap1	Hap2	Hap1		Hap1	Hap2	Hap1	Hap1	Hap1	Hap1	Hap1	Hap2	Hap1	Hap2	Hap1		Hap1	Hap1	Hap1	Hap1	Hap1	Hap1	Hap1
D017	japonica	Heilongjiang, China	56	11.6	0.193333	Hap1	Hap1		Hap1		Hap1		Hap1			Hap2	Hap1		Hap1	Hap2	Hap1	Hap1			Hap1	Hap2	Hap1	Hap2	Hap1		Hap1	Hap1		Hap1	Hap1	Hap1	Hap1
D018	indica	Zhejiang, China	90	13.5667	0.19				Hap2			Hap1	Hap1							Hap1					Hap1			Hap1	Hap2	0.0252898				Hap2		Hap1	Hap1
D019	japonica	Zhejiang, China	72	12.3333	0.2875	Hap1			Hap1		Hap1	Hap1	Hap1	Hap1		Hap2	Hap1			Hap2	Hap1	Hap1	Hap1	Hap1	Hap1	Hap2	Hap1	Hap2	Hap1		Hap1		Hap1	Hap1	Hap1	Hap1	Hap1
D020	japonica	Zhejiang, China	72	16.4	0.3	Hap1	Hap1		Hap1		Hap1	Hap1	Hap1			Hap2			Hap1	Hap2		Hap1			Hap1	Hap2	Hap1		Hap1						Hap1	Hap1	Hap1
D021	indica	Zhejiang, China	90	17.7667	0.2675	Hap1			Hap2		Hap1		Hap1				Hap2			Hap1		Hap2		Hap1		Hap1		Hap1	Hap2				Hap1	Hap2	Hap2	Hap1	Hap1
D022	japonica	Zhejiang, China	84	12.5333	0.176667	Hap1			Hap1		Hap1	Hap1	Hap1			Hap2				Hap2	Hap1	Hap1			Hap1	Hap2	Hap1		Hap1		Hap1			Hap1	Hap1	Hap1	Hap1
D023	indica	Zhejiang, China	90	15.1	0.28	Hap2						Hap1	Hap1	Hap2		Hap1	Hap2			Hap1		Hap1	Hap2	Hap1	Hap1			Hap1			Hap2	Hap1			Hap1	Hap1	Hap1
D024	indica	Zhejiang, China	72	16.5667	0.263333	Hap2	Hap1		Hap1			Hap1	Hap1	Hap2			Hap1		Hap1	Hap2	Hap2	Hap2	Hap2	Hap1	Hap1	Hap1			Hap1				Hap1	Hap1	Hap1	Hap1	Hap1
D025	indica	Zhejiang, China	70	14.8	0.28	Hap2						Hap1	Hap1	Hap2		Hap1				Hap1		Hap1	Hap2	Hap1	Hap1			Hap1			Hap2	Hap1			Hap1	Hap1	Hap1
D026	japonica	Zhejiang, China	6	NA	NA		Hap1	0.0572388	Hap1		Hap1	Hap1	Hap1			Hap2	Hap1	0.0624063	Hap1	Hap2	Hap1	Hap1				Hap2	Hap1	Hap2			Hap1	Hap1		Hap1	Hap1	Hap1	Hap1
D027	japonica	Zhejiang, China	30	NA	NA	Hap1	Hap1	0.0607856	Hap1		Hap1	Hap1	Hap1			Hap2	Hap1	0.0119291	Hap1	Hap2	Hap1	Hap1			Hap1	Hap2	Hap1		Hap1	0.0119291	Hap1	Hap1		Hap1	Hap1	Hap1	Hap1
D028	indica	Zhejiang, China	80	11.8667	0.236667	Hap2						Hap1	Hap1	Hap2		Hap1						Hap2	Hap2	Hap1	Hap1							Hap1	Hap1			Hap1	Hap1
D029	japonica	Zhejiang, China	70	11.0333	0.216667	Hap1	Hap1	0.0856422	Hap1		Hap1	Hap1	Hap1		Hap1	Hap2	Hap1	0.0134133	Hap1	Hap2	Hap1	Hap1	Hap1	Hap1	Hap1	Hap2	Hap1		Hap1	0.0134133	Hap1	Hap1	Hap1	Hap1	Hap1	Hap1	Hap1
D030	indica	Guangdong, China	86	18.3	0.335	Hap2					Hap2	Hap1	Hap1	Hap2		Hap1	Hap2	0.0535302	Hap2	Hap1	Hap2	Hap2	Hap2	Hap1	Hap1		Hap2		Hap2	0.0535302		Hap1	Hap1		Hap1	Hap1	Hap1
D031	japonica	Jilin, China	74	14.4667	0.296667	Hap1	Hap1	0.0107753	Hap1		Hap1	Hap1	Hap1			Hap2	Hap1		Hap1	Hap2		Hap1			Hap1	Hap2	Hap1	Hap2	Hap1			Hap1	Hap1	Hap1	Hap1		Hap1
D032	indica	Hu'nan, China	96	16.8667	0.28		Hap2	0.0254909	Hap2							Hap1	Hap2	0.0771387		Hap1	Hap2	Hap2					Hap2	Hap1	Hap2	0.0771387			Hap2	Hap2	Hap1		Hap2
D033	japonica	Liaoning, China	82	13.0667	0.226667	Hap1	Hap1	0.0752208	Hap1		Hap1	Hap1	Hap1	Hap1		Hap2	Hap1		Hap1	Hap2	Hap1	Hap1			Hap1	Hap2	Hap1	Hap2	Hap1		Hap1	Hap1	Hap1	Hap1	Hap1
D034	indica	Philippines	44	15.6	0.29						Hap3	Hap2	Hap2			Hap1				Hap1				Hap2					Hap2	0.254129	Hap1			Hap2	Hap2	Hap2
D035	japonica	Taiwan, China	82	13.6333	0.223333	Hap1	Hap1		Hap1		Hap1	Hap1	Hap1	Hap1			Hap1		Hap1	Hap2	Hap1	Hap1	Hap1	Hap1	Hap1	Hap2	Hap1		Hap1		Hap1	Hap1	Hap1	Hap1	Hap1	Hap1	Hap1
D036	japonica	Taiwan, China	78	14.2333	0.183333	Hap1	Hap1		Hap1			Hap1	Hap1	Hap1	Hap1		Hap1	0.0142743	Hap1	Hap2	Hap1	Hap1	Hap1	Hap1	Hap1	Hap2	Hap1		Hap1	0.0142743	Hap1	Hap1	Hap1	Hap1	Hap1	Hap1	Hap1
D037	japonica	Taiwan, China	72	16.1333	0.186667	Hap1	Hap1	0.0215005	Hap1		Hap1	Hap1	Hap1	Hap1	Hap1	Hap2			Hap1	Hap2	Hap1	Hap1	Hap1	Hap1	Hap1	Hap2	Hap1		Hap1	0.0125459			Hap1	Hap1	Hap1	Hap1	Hap1
D038	japonica	Taiwan, China	78	12.7333	0.2	Hap1	Hap1	0.0540695	Hap1		Hap1	Hap1	Hap1	Hap1	Hap1	Hap2	Hap1	0.0266366	Hap1	Hap2	Hap1	Hap1		Hap1	Hap1	Hap2	Hap1		Hap1	0.0266366	Hap1	Hap1	Hap1	Hap1	Hap1	Hap1	Hap1
D039	japonica	Taiwan, China	94	16.3333	0.216667	Hap1	Hap1	0.0363852	Hap1		Hap1	Hap1	Hap1	Hap1	Hap1	Hap2	Hap1		Hap1	Hap2	Hap1	Hap1		Hap1	Hap1	Hap2	Hap1		Hap1		Hap1	Hap1		Hap1	Hap1	Hap1	Hap1
D040	indica	Sichuan, China	96	17.0667	0.3375	Hap2						Hap1	Hap1	Hap2			Hap2	0.0291761		Hap2	Hap2	Hap2		Hap1	Hap1		Hap2					Hap1			Hap1	Hap1	Hap1
D041	japonica	Taiwan, China	86	16.2333	0.243333	Hap1	Hap1		Hap1			Hap1	Hap1	Hap1	Hap1		Hap1		Hap1	Hap2	Hap1	Hap1	Hap1	Hap1	Hap1	Hap2	Hap1		Hap1			Hap1	Hap1	Hap1	Hap1	Hap1	Hap1
D042	japonica	Hebei, China	76	12.5667	0.2325	Hap1			Hap1		Hap1	Hap1	Hap1		Hap1	Hap2	Hap1	0.064736	Hap1	Hap2	Hap1	Hap1	Hap1	Hap1	Hap1	Hap2	Hap1	Hap2	Hap1	0.064736	Hap1	Hap1	Hap1	Hap1	Hap1	Hap1	Hap1
D043	indica	Sichuan, China	80	16.3667	0.3125		Hap2	0.0451431				Hap1	Hap1	Hap2		Hap1				Hap1	Hap2	Hap2		Hap1	Hap1	Hap1	Hap2		Hap2	0.159285		Hap1	Hap1	Hap2	Hap1	Hap1	Hap1
D044	japonica	Sichuan, China	80	13.6667	0.206667	Hap1	Hap1		Hap1		Hap1	Hap1	Hap1		Hap1	Hap2	Hap1		Hap1	Hap2	Hap1	Hap1	Hap1	Hap1	Hap1	Hap2	Hap1		Hap1		Hap1	Hap1	Hap1	Hap1	Hap1	Hap1	Hap1
D045	indica	Jiangsu, China	94	13.5333	0.246667				Hap2			Hap1	Hap1			Hap1	Hap2		Hap2		Hap1	Hap1		Hap1	Hap1				Hap2				Hap1		Hap1	Hap1	Hap1
D046	indica	Jiangsu, China	90	10.9333	0.236667	Hap2						Hap1	Hap1							Hap1	Hap2			Hap1				Hap1	Hap2		Hap2	Hap1			Hap1	Hap1	Hap1
D047	japonica	Taiwan, China	78	10.3333	0.173333	Hap1	Hap1		Hap1			Hap1	Hap1	Hap1	Hap1	Hap2	Hap1		Hap1	Hap2	Hap1	Hap1	Hap1	Hap1	Hap1	Hap2	Hap1		Hap1		Hap1			Hap1	Hap1	Hap1	Hap1
D048	japonica	Heilongjiang, China	80	11.4	0.193333	Hap1			Hap1		Hap1		Hap1			Hap2			Hap1	Hap2		Hap1			Hap1	Hap2	Hap1	Hap2	Hap1		Hap1	Hap1	Hap1	Hap1	Hap1	Hap1	Hap1
D049	indica	Zhejiang, China	74	18.2667	0.305							Hap1	Hap1	Hap2		Hap2				Hap2				Hap1	Hap1						Hap2	Hap1	Hap1		Hap2	Hap1	Hap1
D050	indica	Hu'nan, China	76	14.4667	0.21				Hap1		Hap1		Hap1			Hap2				Hap2	Hap2	Hap2		Hap1		Hap1	Hap2	Hap2	Hap1	0.0486516				Hap1	Hap1	Hap1	Hap1
D051	indica	Guangdong, China	88	15.5333	0.263333				Hap2		Hap1		Hap1			Hap1				Hap1		Hap2		Hap1	Hap2	Hap1	Hap2		Hap2			Hap1		Hap2	Hap2	Hap1	Hap1
D052	indica	Guangdong, China	60	14.1	0.186667				Hap2		Hap1		Hap1							Hap1	Hap1	Hap1		Hap1	Hap2	Hap1		Hap1	Hap2				Hap1	Hap2	Hap1	Hap1	Hap1
D053	indica	Guangdong, China	64	15.9333	0.226667	Hap2	Hap2		Hap2		Hap1		Hap1			Hap1				Hap1	Hap1	Hap1	Hap2	Hap1	Hap1				Hap2		Hap2				Hap1	Hap1	Hap1
D054	japonica	Japan	42	13.7333	0.1975	Hap1	Hap1		Hap1		Hap1	Hap1	Hap1			Hap2				Hap2	Hap1	Hap1			Hap1	Hap2	Hap1		Hap1		Hap1	Hap1	Hap1	Hap1	Hap1		Hap1
D055	indica	Zhejiang, China	48	13.8667	0.3025		Hap2		Hap2			Hap1	Hap1			Hap1			Hap2	Hap1	Hap2	Hap2	Hap2	Hap1					Hap2		Hap2			Hap2	Hap1	Hap1	Hap1
D056	indica	Zhejiang, China	88	17.4333	0.295	Hap2	Hap2						Hap1			Hap1	Hap2		Hap2	Hap1	Hap2	Hap2		Hap1	Hap1		Hap2		Hap2		Hap2	Hap1	Hap1	Hap2	Hap1	Hap1	Hap1
D057	indica	Jiangxi, China	92	12.7	0.26	Hap2			Hap2			Hap1	Hap1	Hap2		Hap1				Hap1	Hap2	Hap2	Hap2	Hap1	Hap1		Hap2	Hap1	Hap2	0.0124668	Hap2	Hap1		Hap2	Hap1	Hap1	Hap1
D058	indica	Hu'nan, China	98	17.6	0.315	Hap2						Hap1	Hap1			Hap1	Hap2	0.0283683		Hap1	Hap2	Hap2			Hap1								Hap1		Hap1	Hap1	Hap1
D059	indica	Sichuan, China	90	22.1667	0.296667	Hap2						Hap1	Hap1							Hap1	Hap2	Hap2		Hap1	Hap1	Hap1	Hap2				Hap2	Hap1		Hap1	Hap1	Hap1	Hap1
D060	indica	Guangdong, China	84	12.4333	0.23	Hap2						Hap1	Hap1			Hap1				Hap1	Hap2	Hap2		Hap1	Hap1		Hap2	Hap1			Hap2	Hap1	Hap1		Hap1	Hap1	Hap1
D061	indica	Guangxi, China	78	16.6333	0.233333	Hap2	Hap2	0.0113639	Hap2		Hap2		Hap1			Hap1	Hap2	0.0413425		Hap1	Hap2	Hap2	Hap2	Hap1	Hap1		Hap2		Hap2	0.0413425	Hap2	Hap1		Hap2	Hap1	Hap1	Hap1
D062	indica	Guangxi, China	92	19.0333	0.35				Hap2					Hap2						Hap1	Hap2	Hap2													Hap1	Hap1	Hap1
D063	indica	Fujian, China	76	15.3667	0.22				Hap2	0.0119291	Hap1		Hap1			Hap1	Hap2		Hap2	Hap1	Hap2	Hap2		Hap1	Hap2				Hap2		Hap1		Hap1	Hap2	Hap1	Hap1	Hap1
D064	japonica	Jiangsu, China	90	16.5667	0.25	Hap1	Hap1		Hap1	0.0125459	Hap1		Hap1							Hap2	Hap1	Hap1		Hap1	Hap1	Hap2	Hap1	Hap2				Hap1		Hap1	Hap1	Hap1	Hap1
D065	japonica	Jiangsu, China	56	11.2	0.18				Hap1	0.0129552						Hap2					Hap1	Hap1		Hap1		Hap2	Hap1		Hap1						Hap1	Hap1	Hap1
D066	japonica	Jiangsu, China	82	13.6333	0.2825	Hap1	Hap1	0.0284954	Hap1	0.013088	Hap1	Hap1	Hap1						Hap1	Hap2	Hap1	Hap1		Hap1	Hap1	Hap2	Hap1	Hap2	Hap1	0.013088				Hap1	Hap1	Hap1	Hap1
D067	japonica	He'nan, China	78	12.0333	0.19				Hap1	0.013298						Hap2				Hap2	Hap1					Hap2	Hap1		Hap1				Hap1	Hap1	Hap1	Hap1	Hap1
D068	japonica	Hebei, China	74	12.4333	0.2075		Hap1	0.10111	Hap1	0.0134133		Hap1	Hap1			Hap2	Hap1			Hap2	Hap1	Hap1		Hap1	Hap1	Hap2	Hap1		Hap1					Hap1	Hap1	Hap1	Hap1
D069	japonica	Hebei, China	76	13.7667	0.2575	Hap1	Hap1		Hap1	0.0142743	Hap1	Hap1	Hap1		Hap1	Hap2				Hap2	Hap1	Hap1		Hap1	Hap1	Hap2	Hap1		Hap1	0.141679		Hap1	Hap1	Hap1	Hap1	Hap1
D070	indica	Guangdong, China	88	17.1	0.2875																Hap2						Hap2								Hap1		Hap2
D071	indica	Guangdong, China	68	13.4667	0.273333						Hap1										Hap2	Hap2		Hap1	Hap2	Hap1	Hap2		Hap2				Hap1	Hap2	Hap1	Hap1	Hap1
D072	indica	Guangdong, China	78	14.5333	0.296667	Hap1	Hap2				Hap1		Hap1		Hap2	Hap1			Hap2	Hap1		Hap2		Hap1	Hap2	Hap1	Hap2	Hap1	Hap2			Hap1	Hap1		Hap1	Hap1	Hap1
D073	indica	Guangdong, China	34	NA	NA	Hap2	Hap2	0.143723	Hap2	0.0145639	Hap2	Hap1	Hap1	Hap2		Hap1	Hap2	0.0580172	Hap2	Hap1	Hap2	Hap2	Hap2	Hap1	Hap1				Hap2	0.0580172	Hap2	Hap1	Hap1	Hap2	Hap1	Hap1	Hap1
D074	indica	Guangdong, China	60	13.9667	0.236667	Hap2	Hap2	0.0384559	Hap2	0.0147378	Hap1	Hap1	Hap1	Hap2		Hap1				Hap1	Hap2	Hap2	Hap2	Hap1	Hap1			Hap1			Hap2	Hap1	Hap1	Hap2	Hap1	Hap1	Hap1
D075	indica	Hu'nan, China	94	13.8333	0.226667	Hap2	Hap2					Hap1	Hap1	Hap2		Hap1			Hap2		Hap2	Hap2	Hap2	Hap1		Hap1	Hap2		Hap2			Hap1	Hap1		Hap1	Hap1	Hap1
D076	japonica	Jiangsu, China	80	22.6333	0.343333	Hap1	Hap1	0.0187386	Hap1	0.0150546	Hap1	Hap1	Hap1		Hap1	Hap2	Hap1	0.0387594		Hap2	Hap1	Hap1	Hap1	Hap1	Hap1	Hap2	Hap1	Hap2	Hap1	0.0387594	Hap1	Hap1	Hap1	Hap1	Hap1	Hap1	Hap1
D077	japonica	Jiangsu, China	80	10.7	0.2	Hap1	Hap1	0.149886	Hap1	0.0150927	Hap1	Hap1	Hap1		Hap1	Hap2	Hap1		Hap1	Hap2	Hap1	Hap1	Hap1	Hap1	Hap1	Hap2	Hap1		Hap1		Hap1	Hap1	Hap1	Hap1	Hap1	Hap1	Hap1
D078	japonica	Jiangsu, China	78	11.0667	0.226667	Hap1	Hap1	0.02413	Hap1	0.0151205	Hap1	Hap1	Hap1	Hap1	Hap1	Hap2	Hap1	0.049173	Hap1	Hap2	Hap1	Hap1		Hap1	Hap1	Hap2	Hap1		Hap1	0.049173	Hap1	Hap1	Hap1	Hap1	Hap1	Hap1	Hap1
D079	indica	Jiangsu, China	88	16.2	0.233333		Hap2				Hap1		Hap1		Hap2	Hap1	Hap2	0.2089	Hap2					Hap1	Hap2	Hap1			Hap2	0.2089	Hap2	Hap1	Hap1		Hap2	Hap1	Hap1
D080	japonica	Jiangsu, China	100	10.9333	0.226667	Hap1	Hap1	0.0232492	Hap1	0.0162439	Hap1	Hap1	Hap1	Hap1	Hap1	Hap2	Hap1		Hap1	Hap2	Hap1	Hap1	Hap1	Hap1	Hap1	Hap2	Hap1	Hap2	Hap1		Hap1	Hap1	Hap1	Hap1	Hap1	Hap1	Hap1
D081	indica	Hubei, China	96	16.2333	0.255	Hap1	Hap2	0.0666091	Hap2	0.0164146	Hap1		Hap1			Hap1	Hap2	0.0728651	Hap2	Hap1	Hap2	Hap2		Hap1	Hap2		Hap2	Hap1	Hap2	0.0728651		Hap1	Hap1	Hap2	Hap1	Hap1	Hap1
D082	japonica	Liaoning, China	76	13.5	0.23	Hap1	Hap1		Hap1	0.0168829	Hap1	Hap1	Hap1	Hap1	Hap1	Hap2	Hap1	0.0164146	Hap1	Hap2	Hap1	Hap1	Hap1	Hap1	Hap1	Hap2	Hap1	Hap2	Hap1	0.0164146	Hap1	Hap1	Hap1	Hap1	Hap1	Hap1	Hap1
D083	japonica	Jilin, China	50	12.9333	0.206667	Hap1	Hap1	0.0450758	Hap1	0.0266366	Hap1	Hap1	Hap1	Hap1		Hap2	Hap1	0.0409687	Hap1	Hap2		Hap1			Hap1	Hap2	Hap1	Hap2	Hap1	0.0409687	Hap1	Hap1	Hap1	Hap1	Hap1		Hap1
D084	japonica	Hebei, China	74	13.1667	0.22	Hap1	Hap1		Hap1	0.0268656	Hap1	Hap1	Hap1	Hap1		Hap2	Hap1		Hap1	Hap2	Hap1	Hap1			Hap1	Hap2	Hap1	Hap2	Hap1		Hap1	Hap1	Hap1	Hap1	Hap1		Hap1
D085	japonica	He'nan, China	84	11.5667	0.25	Hap1	Hap1		Hap1	0.0273389	Hap1	Hap1	Hap1	Hap1	Hap1	Hap2	Hap1		Hap1	Hap2	Hap1	Hap1	Hap1	Hap1	Hap1	Hap2	Hap1	Hap2	Hap1		Hap1	Hap1	Hap1	Hap1	Hap1	Hap1	Hap1
D086	indica	He'nan, China	84	15.5333	0.29	Hap1			Hap2	0.0276992	Hap1		Hap1		Hap2	Hap1	Hap2		Hap2	Hap1		Hap2		Hap1	Hap2	Hap1		Hap1	Hap2			Hap1	Hap1	Hap2	Hap2	Hap1	Hap1
D087	japonica	Liaoning, China	70	12.8667	0.19	Hap1	Hap1	0.0452803	Hap1	0.0327227	Hap1	Hap1	Hap1	Hap1	Hap1	Hap2	Hap1		Hap1	Hap2	Hap1	Hap1	Hap1	Hap1	Hap1	Hap2	Hap1	Hap2	Hap1		Hap1	Hap1	Hap1	Hap1	Hap1	Hap1	Hap1
D088	indica	Guangdong, China	94	18.4333	0.333333	Hap2					Hap2	Hap1	Hap1	Hap2						Hap1	Hap2	Hap2	Hap2	Hap1	Hap1		Hap2						Hap1	Hap1	Hap1	Hap1	Hap1
D089	japonica	Jilin, China	40	17.2667	0.203333		Hap1	0.04633	Hap1	0.0366007				Hap1		Hap2	Hap1	0.0520828	Hap1	Hap2		Hap1	Hap1	Hap1	Hap1	Hap2	Hap1	Hap2	Hap1	0.0520828				Hap1	Hap1	Hap1
D090	japonica	Heilongjiang, China	90	18.5	0.275		Hap1	0.088897	Hap1	0.0373705	Hap1	Hap1	Hap1		Hap1	Hap2	Hap1	0.0145639		Hap2		Hap1	Hap1	Hap1	Hap1	Hap2	Hap1	Hap2	Hap1	0.0145639		Hap1	Hap1	Hap1	Hap1	Hap1	Hap1
D091	japonica	Taiwan, China	60	9.03333	0.1375		Hap1	0.0295756	Hap1	0.0387594	Hap1	Hap1	Hap1	Hap1	Hap1	Hap2	Hap1	0.0151205	Hap1	Hap2	Hap1	Hap1	Hap1	Hap1	Hap1	Hap2	Hap1		Hap1	0.0151205	Hap1	Hap1	Hap1	Hap1	Hap1	Hap1
D092	japonica	Taiwan, China	74	10.3	0.153333				Hap1	0.0404447				Hap1	Hap1		Hap1		Hap1	Hap2				Hap1	Hap1	Hap2	Hap1		Hap1				Hap1	Hap1	Hap1	Hap1
D093	indica	Guangxi, China	52	11.4	0.1725		Hap2	0.244747			Hap1	Hap1			Hap2	Hap1			Hap2			Hap2				Hap1			Hap2	0.354904				Hap2	Hap2	Hap1
D094	indica	Jiangxi, China	94	13.0667	0.223333	Hap2	Hap1		Hap1	0.0409687	Hap2	Hap1	Hap1	Hap2		Hap1	Hap1		Hap1	Hap2			Hap2	Hap1	Hap1		Hap2		Hap1		Hap2	Hap1	Hap1	Hap1	Hap2	Hap1	Hap1
D095	indica	Zhejiang, China	90	13.3667	0.313333	Hap2			Hap2	0.0486516	Hap2	Hap1	Hap1	Hap2		Hap1			Hap2	Hap1			Hap2	Hap1	Hap1		Hap2		Hap2	0.0146253		Hap1	Hap1	Hap2	Hap2	Hap1	Hap1
D096	indica	Hubei, China	80	10.6667	0.243333	Hap2					Hap2	Hap1	Hap1	Hap2		Hap1				Hap1	Hap2	Hap2		Hap1	Hap1		Hap2					Hap1			Hap1	Hap1
D097	indica	Anhui, China	84	25.0333	0.326667	Hap2					Hap2	Hap1	Hap1	Hap2							Hap2	Hap2	Hap2	Hap1	Hap1						Hap2	Hap1	Hap1	Hap1	Hap1	Hap1	Hap1
D098	indica	Zhejiang, China	88	17.8667	0.293333											Hap1					Hap1	Hap1											Hap2		Hap1
D099	japonica	Anhui, China	84	20.2333	0.3375	Hap1	Hap1	0.127768	Hap1	0.049173		Hap1	Hap1		Hap1	Hap2	Hap1		Hap1	Hap2	Hap1	Hap1		Hap1	Hap1	Hap2	Hap1	Hap2	Hap1		Hap1	Hap1	Hap1	Hap1	Hap1	Hap1	Hap1
D100	indica	Hu'nan, China	58	18.8	0.283333							Hap1	Hap1								Hap2	Hap2			Hap1	Hap1	Hap2							Hap1	Hap1	Hap1	Hap1
D101	indica	Guangdong, China	86	17.0333	0.24						Hap2	Hap1	Hap1								Hap2	Hap2		Hap1	Hap1	Hap1	Hap2						Hap1	Hap1	Hap1	Hap1	Hap1
D102	japonica	Jiangsu, China	96	12.9667	0.203333				Hap1	0.0520828			Hap1							Hap2	Hap1	Hap1	Hap1			Hap2	Hap1		Hap1						Hap1	Hap1	Hap1
D103	japonica	Jiangsu, China	72	14.8	0.2775	Hap1			Hap1	0.0621544	Hap1		Hap1							Hap2	Hap1	Hap1			Hap1	Hap2	Hap1	Hap2	Hap1	0.0366007	Hap1			Hap1	Hap1	Hap1	Hap1
D104	japonica	Jiangsu, China	84	12.1667	0.2475	Hap1			Hap1	0.0624063			Hap1			Hap2			Hap1	Hap2	Hap1	Hap1			Hap1	Hap2	Hap1		Hap1	0.0276992				Hap1	Hap1	Hap1	Hap1
D105	indica	Guangdong, China	32	NA	NA						Hap1		Hap1			Hap1					Hap2	Hap2		Hap1	Hap2	Hap1		Hap1			Hap2	Hap1			Hap1	Hap1	Hap1
D106	indica	Hu'nan, China	50	12.5333	0.22				Hap2	0.064736										Hap1						Hap1	Hap2		Hap2						Hap1
D107	japonica	Heilongjiang, China	70	13.5667	0.176667		Hap1		Hap1	0.0682754	Hap1	Hap1	Hap1	Hap1		Hap2			Hap1	Hap2	Hap1	Hap1	Hap1	Hap1	Hap1	Hap2	Hap1	Hap2	Hap1		Hap1	Hap1	Hap1	Hap1	Hap1	Hap1	Hap1
D108	indica	Jiangsu, China	74	14.1667	0.276667				Hap2	0.071923										Hap1							Hap2		Hap2						Hap2	Hap1	Hap1
D109	japonica	Jiangsu, China	66	11.6333	0.21		Hap1		Hap1		Hap1		Hap1				Hap1		Hap1	Hap2	Hap1	Hap1		Hap1	Hap1	Hap2	Hap1		Hap1				Hap1	Hap1	Hap1	Hap1	Hap1
D110	japonica	Jiangsu, China	82	12.0667	0.233333	Hap1	Hap1		Hap1		Hap1		Hap1			Hap2			Hap1	Hap2	Hap1	Hap1			Hap1	Hap2	Hap1	Hap2	Hap1						Hap1	Hap1	Hap1
D111	indica	Jiangsu, China	64	17.4333	0.423333	Hap1						Hap1			Hap2					Hap1	Hap2	Hap2			Hap1	Hap1	Hap2	Hap1			Hap2				Hap1	Hap1
D112	indica	Zhejiang, China	94	14.5	0.25	Hap2	Hap2					Hap1	Hap1	Hap2			Hap2		Hap2	Hap1			Hap2	Hap1	Hap1		Hap2	Hap1	Hap2			Hap1			Hap2	Hap1	Hap1
D113	indica	Zhejiang, China	100	13.3	0.29	Hap2	Hap2	0.0119442	Hap2			Hap1	Hap1	Hap2					Hap2	Hap1				Hap1	Hap1		Hap2		Hap2	0.0143017		Hap1		Hap2	Hap2	Hap1	Hap1
D114	japonica	Zhejiang, China	82	13.2	0.26	Hap1	Hap1		Hap1		Hap1	Hap1	Hap1		Hap1	Hap2	Hap1	0.0147378	Hap1	Hap2	Hap1	Hap1			Hap1	Hap2	Hap1	Hap2	Hap1	0.0147378	Hap1	Hap1			Hap1	Hap1	Hap1
D115	japonica	Zhejiang, China	74	9.66667	0.18	Hap1	Hap1	0.032213	Hap1		Hap1	Hap1	Hap1			Hap2	Hap1		Hap1	Hap2	Hap1	Hap1				Hap2	Hap1	Hap2	Hap1		Hap1	Hap1		Hap1	Hap1	Hap1	Hap1
D116	indica	Vietnam	62	17.9333	0.28	Hap1			Hap2		Hap1	Hap1	Hap1	Hap1	Hap2	Hap1					Hap1			Hap1	Hap1				Hap2			Hap1	Hap1	Hap2	Hap1	Hap1
D117	indica	Philippines	76	20.5333	0.203333																Hap1	Hap1				Hap1									Hap1
D118	indica	Nepal	60	15.2333	0.286667	Hap2					Hap1	Hap1	Hap1	Hap1										Hap1	Hap1							Hap1	Hap1		Hap2	Hap1	Hap1
D119	indica	India	36	NA	NA							Hap1			Hap2						Hap1	Hap1						Hap1							Hap1	Hap1
D120	indica	Philippines	24	NA	NA	Hap2					Hap2	Hap1	Hap1			Hap1				Hap1	Hap2	Hap2	Hap2	Hap1	Hap1				Hap2		Hap2	Hap1	Hap1		Hap1	Hap1	Hap1
D121	indica	China	86	14.7333	0.2825		Hap2		Hap2							Hap1				Hap1	Hap2	Hap2						Hap1					Hap2		Hap1		Hap2
D122	indica	China	94	26.0667	0.3875	Hap2						Hap1	Hap1	Hap2							Hap2	Hap2	Hap2	Hap1	Hap1	Hap1						Hap1	Hap1	Hap1	Hap1	Hap1	Hap1
D123	indica	Guangdong, China	84	22.8667	0.37	Hap2						Hap1	Hap1	Hap2						Hap1	Hap2	Hap2	Hap2	Hap1	Hap1	Hap1					Hap2	Hap1	Hap1	Hap1	Hap1	Hap1	Hap1
D124	indica	Bhutan	94	16.3	0.34										Hap2						Hap2	Hap2		Hap2		Hap1					Hap2	Hap2		Hap1	Hap1
D125	indica	India	82	21.7667	0.296667	Hap2						Hap1	Hap1	Hap1	Hap2	Hap1					Hap1	Hap1		Hap1	Hap1	Hap2						Hap1	Hap1		Hap1	Hap1	Hap1
D126	indica	Madagascar	90	20.1	0.3	Hap1	Hap2		Hap2		Hap1	Hap1	Hap1	Hap1	Hap2	Hap1	Hap2		Hap2	Hap1	Hap1	Hap1			Hap1			Hap1	Hap2			Hap1		Hap2	Hap1	Hap1	Hap1
D127	indica	China	44	21.4333	0.286667	Hap2	Hap2		Hap2			Hap1		Hap2		Hap1				Hap1	Hap1	Hap1	Hap2	Hap1	Hap1						Hap2	Hap1	Hap1		Hap1	Hap1	Hap1
D128	indica	Taiwan, China	74	11.2667	0.185	Hap2			Hap2			Hap1	Hap1	Hap2		Hap1	Hap2		Hap2	Hap1	Hap2	Hap2	Hap2	Hap1	Hap1				Hap2		Hap2	Hap1	Hap1		Hap1	Hap1	Hap1
D129	indica	China	68	13.1333	0.216667	Hap1			Hap2			Hap1		Hap1	Hap2	Hap1				Hap1	Hap1			Hap1	Hap1				Hap2			Hap1	Hap1	Hap2	Hap1	Hap1	Hap1
D130	indica	Burma	28	NA	NA		Hap2		Hap2		Hap3	Hap2	Hap2			Hap1	Hap2		Hap2	Hap1				Hap2					Hap2		Hap1			Hap2	Hap2	Hap2
D131	indica	Philippines	42	16.6667	0.2325				Hap2		Hap1	Hap1	Hap1	Hap1	Hap1	Hap2	Hap1			Hap1	Hap1		Hap1			Hap1		Hap2			Hap1		Hap2		Hap1	Hap1	Hap1
D132	indica	Philippines	82	13.3	0.216667		Hap2		Hap2			Hap1		Hap2		Hap2				Hap1	Hap1		Hap2						Hap2				Hap2	Hap2	Hap1	Hap1	Hap1
D133	indica	India	66	20.8	0.305						Hap3	Hap2												Hap2										Hap1	Hap2	Hap2
D134	indica	India	80	18.5333	0.336667						Hap3	Hap2	Hap2											Hap2											Hap2	Hap2
D135	indica	Bhutan	90	12.3333	0.24						Hap3	Hap2	Hap2			Hap1					Hap1	Hap1		Hap2								Hap2		Hap1	Hap1	Hap2
D136	indica	Nepal	32	NA	NA						Hap3	Hap2	Hap2			Hap1					Hap1	Hap1		Hap2								Hap2		Hap1	Hap1	Hap2
D137	indica	Nepal	40	15.6333	0.26						Hap3	Hap2	Hap2			Hap1																Hap2			Hap2	Hap2
D138	indica	Bangladesh	52	22.6	0.3425						Hap3	Hap2	Hap2			Hap1								Hap2								Hap2			Hap2	Hap2
D139	indica	Bangladesh	56	21.4667	0.335						Hap3	Hap2	Hap2			Hap1					Hap1	Hap1		Hap2								Hap2			Hap1	Hap2
D140	indica	India	24	NA	NA						Hap3	Hap2									Hap1	Hap1		Hap2								Hap2			Hap1	Hap2
D141	indica	India	32	NA	NA																Hap1	Hap1													Hap1
D142	indica	India	32	NA	NA						Hap3	Hap2	Hap2			Hap1								Hap2										Hap1	Hap2	Hap2
D143	indica	India	30	NA	NA						Hap3	Hap2	Hap2			Hap1								Hap2											Hap2	Hap2
D144	indica	India	50	22.2667	0.3125						Hap3	Hap2												Hap2											Hap2	Hap2
D145	indica	India	62	17.2333	0.263333						Hap3	Hap2	Hap2			Hap1								Hap2								Hap2			Hap2	Hap2
D146	indica	Nepal	76	17.1333	0.233333						Hap3	Hap2	Hap2			Hap1								Hap2								Hap2			Hap1	Hap2
D147	indica	India	86	25.0667	0.3275							Hap2	Hap2			Hap1						Hap1		Hap2								Hap2			Hap1	Hap2
D148	indica	Sri Lanka	38	NA	NA						Hap3	Hap2	Hap2			Hap2	Hap1		Hap1	Hap2				Hap2								Hap2			Hap2	Hap2
D149	indica	India	54	16.4667	0.296667	Hap1					Hap1	Hap1	Hap1	Hap1		Hap2	Hap1		Hap1	Hap1	Hap1	Hap1	Hap1	Hap1	Hap1		Hap1	Hap2				Hap1			Hap1	Hap1	Hap1
D150	japonica	Yunnan, China	94	12.0333	0.25	Hap1	Hap1		Hap1		Hap1	Hap1	Hap1	Hap1	Hap1	Hap2	Hap1		Hap1	Hap2	Hap1	Hap1	Hap1	Hap1	Hap1	Hap2	Hap1	Hap2	Hap1		Hap1	Hap1	Hap1	Hap1	Hap1	Hap1	Hap1
D151	indica	Philippines	50	16.7667	0.193333	Hap1	Hap2		Hap2		Hap1	Hap1	Hap1	Hap1		Hap1				Hap1	Hap1	Hap1		Hap1	Hap1				Hap2		Hap2		Hap1	Hap2	Hap1	Hap1	Hap1
D152	japonica	Burma	24	NA	NA										Hap1						Hap1	Hap1				Hap2	Hap1				Hap1				Hap1
D153	japonica	Laos	36	NA	NA																Hap1	Hap1					Hap1								Hap1
D154	japonica	Brazil	68	21.0333	0.323333	Hap1					Hap1	Hap1	Hap1	Hap1		Hap2	Hap1							Hap1	Hap2							Hap1	Hap1		Hap1		Hap1
D155	japonica	America	84	9.5	0.17				Hap2						Hap1	Hap2	Hap1		Hap1	Hap1	Hap1	Hap1				Hap1		Hap2			Hap1		Hap2		Hap1		Hap2
D156	japonica	Vietnam	50	10.6333	0.16	Hap1			Hap1		Hap1	Hap1	Hap1	Hap1	Hap1					Hap2	Hap1	Hap1	Hap1	Hap1		Hap2		Hap2			Hap1	Hap1	Hap1	Hap1	Hap1	Hap1	Hap1
D157	japonica	Bangladesh	22	NA	NA				Hap2		Hap3	Hap2	Hap2			Hap2	Hap1		Hap1	Hap1	Hap1	Hap1		Hap2				Hap2							Hap1	Hap2
D158	indica	China	78	20.1333	0.336667	Hap2			Hap2			Hap1	Hap1	Hap2		Hap1				Hap1	Hap1	Hap1	Hap2	Hap1	Hap1			Hap1				Hap1	Hap1		Hap1	Hap1	Hap1
D159	indica	Burma	62	18.5667	0.403333							Hap2									Hap1	Hap1		Hap2											Hap1	Hap2
D160	indica	Unknown	86	21.8667	0.373333		Hap2		Hap2		Hap3	Hap2	Hap2			Hap1			Hap2		Hap1	Hap1		Hap2		Hap2			Hap2			Hap2			Hap1	Hap2
D161	indica	Jiangsu, China	40	16.6667	0.26						Hap1	Hap1	Hap1	Hap1	Hap1	Hap1					Hap1	Hap1	Hap1			Hap1					Hap1		Hap2		Hap1	Hap1	Hap1
D162	indica	Guangdong, China	58	17	0.236667		Hap2	0.0228892	Hap2							Hap1			Hap2		Hap2	Hap2					Hap2		Hap2	0.142042			Hap2	Hap2	Hap1		Hap2
D163	japonica	Japan	40	14.5333	0.176667	Hap1			Hap2		Hap1	Hap1	Hap1	Hap1	Hap1	Hap2	Hap1		Hap1	Hap1	Hap1	Hap1	Hap1	Hap1	Hap1	Hap1		Hap2			Hap1	Hap1	Hap1		Hap1	Hap1	Hap1
D164	japonica	Philippines	60	15.4667	0.256667				Hap1		Hap1	Hap1	Hap1	Hap1	Hap1	Hap2	Hap1		Hap1	Hap1	Hap1	Hap1	Hap1			Hap1	Hap1	Hap2			Hap1		Hap2	Hap1	Hap1	Hap1	Hap1
D165	japonica	Philippines	72	21.7667	0.463333				Hap1		Hap1	Hap1	Hap1	Hap1	Hap1	Hap2	Hap1		Hap1	Hap1	Hap1	Hap1	Hap1			Hap1	Hap1	Hap2			Hap1		Hap2	Hap1	Hap1	Hap1	Hap1
D166	japonica	Malaysia	86	13.9333	0.293333				Hap2						Hap1	Hap2	Hap1		Hap1	Hap1	Hap1	Hap1				Hap1	Hap1	Hap2			Hap1		Hap2		Hap1
D167	japonica	Thailand	64	13.1667	0.326667																Hap1	Hap1					Hap1								Hap1
D168	japonica	Laos	92	14.4	0.286667																Hap1	Hap1				Hap2	Hap1								Hap1
D169	japonica	Philippines	78	10.4	0.263333	Hap1			Hap2		Hap1	Hap1	Hap1	Hap1	Hap1	Hap2	Hap1			Hap1	Hap1	Hap1			Hap1	Hap1		Hap2			Hap1		Hap1		Hap1	Hap1	Hap1
D170	japonica	Brazil	90	14.5	0.386667						Hap1	Hap1	Hap1	Hap1	Hap1	Hap2	Hap1		Hap1	Hap1	Hap1	Hap1				Hap1	Hap1	Hap2			Hap1		Hap2		Hap1	Hap1	Hap1
D171	japonica	Japan	24	NA	NA																Hap1	Hap1				Hap2	Hap1								Hap1
D172	japonica	Yugoslavia	78	14.8	0.36		Hap1		Hap1		Hap1	Hap1				Hap2	Hap1		Hap1	Hap2	Hap1	Hap1					Hap1	Hap2	Hap1					Hap1	Hap1	Hap1
D173	japonica	Yugoslavia	94	17.5333	0.39	Hap1	Hap1		Hap1		Hap1	Hap1	Hap1		Hap1	Hap2	Hap1		Hap1	Hap2	Hap1	Hap1	Hap1	Hap1	Hap1	Hap2	Hap1	Hap2	Hap1		Hap1	Hap1	Hap1	Hap1	Hap1	Hap1	Hap1
D174	japonica	Cote d'Ivoire	76	16.8667	0.25						Hap1	Hap1	Hap1	Hap1	Hap1	Hap2	Hap1			Hap1	Hap1	Hap1	Hap1				Hap1	Hap2					Hap2		Hap1	Hap1	Hap1
D175	japonica	Albania	NA	11.2667	0.196667	Hap1	Hap1		Hap1		Hap1		Hap1			Hap2	Hap1		Hap1	Hap2	Hap1	Hap1			Hap1	Hap2	Hap1		Hap1		Hap1	Hap1	Hap1	Hap1	Hap1	Hap1	Hap1
D176	japonica	Japan	46	22.8	0.266667	Hap1	Hap1		Hap1		Hap1	Hap1	Hap1	Hap1	Hap1	Hap2	Hap1		Hap1	Hap2	Hap1	Hap1	Hap1	Hap1		Hap2	Hap1		Hap1		Hap1	Hap1	Hap1	Hap1	Hap1	Hap1	Hap1
D177	japonica	Anhui, China	54	12.5	0.3075	Hap1					Hap1		Hap1		Hap1							Hap1	Hap1	Hap1	Hap1	Hap2	Hap1				Hap1	Hap1	Hap1		Hap1	Hap1	Hap1
D178	indica	Thailand	92	19.8	0.326667	Hap2	Hap2		Hap2			Hap1	Hap1	Hap2		Hap1				Hap1		Hap2	Hap2	Hap1	Hap1		Hap2						Hap1		Hap1	Hap1	Hap1
D179	indica	Thailand	72	15.1333	0.29	Hap1			Hap2		Hap1	Hap1	Hap1		Hap2	Hap1	Hap2		Hap2					Hap1	Hap2	Hap1		Hap1	Hap2			Hap1	Hap1		Hap2	Hap1
D180	indica	Vietnam	18	NA	NA		Hap2		Hap2		Hap1	Hap1			Hap2	Hap1	Hap2		Hap2			Hap2				Hap1			Hap2						Hap2	Hap1
D181	indica	Cuba	18	NA	NA				Hap2		Hap1	Hap1			Hap2	Hap1			Hap2	Hap1		Hap2				Hap1		Hap1	Hap2					Hap2	Hap2	Hap1
D182	indica	Surinam	72	15.0667	0.24						Hap1	Hap1			Hap2	Hap2			Hap1	Hap1						Hap1		Hap2							Hap2	Hap1
D183	japonica	Japan	46	19.5333	0.333333	Hap1	Hap1		Hap1		Hap1	Hap1	Hap1	Hap1		Hap2	Hap1		Hap1	Hap2	Hap1	Hap1	Hap1	Hap1		Hap2	Hap1	Hap2	Hap1		Hap1	Hap1	Hap1	Hap1	Hap1	Hap1	Hap1
D184	indica	Cuba	44	14.5	0.2525	Hap1	Hap2				Hap1		Hap1			Hap1			Hap2	Hap1				Hap1	Hap2	Hap1			Hap2		Hap2	Hap1				Hap1	Hap1
D185	indica	Mexico	82	15.2333	0.333333	Hap2			Hap2				Hap1	Hap1	Hap2	Hap1			Hap2	Hap1	Hap2	Hap2		Hap1	Hap1	Hap1		Hap1	Hap2			Hap1			Hap1	Hap1	Hap1
D186	indica	Mexico	88	16.5333	0.363333	Hap2	Hap2		Hap2			Hap1	Hap1	Hap1	Hap2	Hap1			Hap2		Hap2	Hap2		Hap1	Hap1	Hap1		Hap1	Hap2			Hap1			Hap1	Hap1	Hap1
D187	japonica	Unknown	74	20.1667	0.3325	Hap1			Hap1		Hap1	Hap1	Hap1	Hap1	Hap1	Hap2	Hap1		Hap1	Hap2	Hap1	Hap1	Hap1	Hap1	Hap1	Hap2	Hap1	Hap2			Hap1	Hap1	Hap1	Hap1	Hap1	Hap1	Hap1
D188	indica	Sichuan, China	96	18.9	NA											Hap1				Hap1	Hap1	Hap1					Hap2						Hap2		Hap1		Hap2
D189	japonica	Unknown	70	15.1333	0.333333																Hap1	Hap1				Hap2	Hap1								Hap1
D190	japonica	Taiwan, China	88	11.3333	0.19										Hap1	Hap2			Hap1	Hap1	Hap1	Hap1						Hap2			Hap1		Hap2		Hap1
D191	japonica	Unknown	70	14.8667	0.32	Hap1							Hap1		Hap1						Hap1	Hap1	Hap1	Hap1	Hap1	Hap2	Hap1				Hap1	Hap1	Hap1		Hap1	Hap1	Hap1
D192	indica	Zhejiang, China	62	14.6333	0.383333											Hap1	Hap2		Hap2	Hap1	Hap1	Hap1						Hap1	Hap2				Hap2	Hap2	Hap1		Hap2
D193	indica	Guangxi, China	42	15.5667	0.206667		Hap2		Hap2						Hap2				Hap2	Hap1		Hap2				Hap1			Hap2					Hap2	Hap1
D194	indica	Unknown	44	16.4667	0.303333		Hap2								Hap2	Hap1	Hap2		Hap2		Hap1	Hap1				Hap1			Hap2					Hap2	Hap1
D195	indica	Unknown	80	19.4	0.48											Hap1				Hap1	Hap2	Hap2											Hap2		Hap1		Hap2
D196	indica	Unknown	88	14.3	0.26	Hap1	Hap1		Hap1			Hap1			Hap2	Hap1			Hap1	Hap2	Hap2	Hap2			Hap1	Hap1		Hap1	Hap1			Hap1	Hap1	Hap1	Hap1	Hap1
D197	indica	Unknown	36	NA	NA	Hap1	Hap2				Hap1					Hap1			Hap2	Hap1	Hap1	Hap1		Hap1	Hap2	Hap1		Hap1	Hap2			Hap1	Hap1	Hap2	Hap1	Hap1	Hap1
D198	japonica	Taiwan, China	64	16.7	0.2675				Hap1		Hap1		Hap1	Hap1	Hap1		Hap1	0.0404447	Hap1	Hap2	Hap1	Hap1	Hap1			Hap2	Hap1		Hap1	0.0404447			Hap1	Hap1	Hap1	Hap1	Hap1
D199	japonica	Jiangsu, China	86	17.6	0.273333				Hap1				Hap1				Hap1			Hap2	Hap1					Hap2	Hap1		Hap1						Hap1	Hap1	Hap1
D200	japonica	Shanxi, China	92	16.8	0.24	Hap1	Hap1		Hap1		Hap1	Hap1	Hap1			Hap2	Hap1		Hap1	Hap2	Hap1	Hap1	Hap1	Hap1	Hap1	Hap2	Hap1	Hap2				Hap1	Hap1	Hap1	Hap1	Hap1	Hap1
D201	japonica	Hainan, China	36	NA	NA																Hap1					Hap2									Hap1
D202	japonica	Jiangsu, China	84	17.9333	0.313333	Hap1			Hap1		Hap1	Hap1	Hap1		Hap1		Hap1	0.0150927		Hap2	Hap1	Hap1		Hap1	Hap1	Hap2	Hap1		Hap1	0.0150927		Hap1	Hap1	Hap1	Hap1	Hap1	Hap1
D203	japonica	Guizhou, China	68	23.3333	0.36	Hap1	Hap1	0.114556	Hap1				Hap1		Hap1		Hap1	0.148791	Hap1	Hap2		Hap1	Hap1	Hap1		Hap2	Hap1	Hap2	Hap1	0.148791			Hap1	Hap1	Hap1	Hap1	Hap1
D204	japonica	Heilongjiang, China	46	14.7	0.173333	Hap1	Hap1		Hap1		Hap1		Hap1				Hap1		Hap1	Hap2	Hap1	Hap1			Hap1	Hap2	Hap1	Hap2	Hap1					Hap1	Hap1	Hap1	Hap1
D205	indica	Hu'nan, China	82	19.3	0.25						Hap2	Hap1		Hap2						Hap1		Hap2	Hap2	Hap1	Hap1	Hap1						Hap1	Hap1	Hap1	Hap1	Hap1	Hap1
D206	indica	Hu'nan, China	86	15.0333	0.196667							Hap2									Hap2								Hap2	0.198103				Hap2	Hap1	Hap2
D207	indica	Zhejiang, China	82	11.5667	0.22	Hap2			Hap2			Hap1		Hap2	Hap2	Hap1	Hap2			Hap1			Hap2	Hap1	Hap1			Hap1	Hap2			Hap1	Hap1	Hap2	Hap1	Hap1	Hap1
D208	indica	Jiangsu, China	96	12	0.286667	Hap1					Hap1	Hap1			Hap2	Hap1	Hap2			Hap1	Hap2	Hap2			Hap1	Hap1	Hap2	Hap1				Hap1	Hap1		Hap1	Hap1
D209	indica	Guangdong, China	54	20.6667	0.276667		Hap2		Hap2																			Hap1					Hap2
D210	japonica	Hubei, China	64	14.7333	0.22	Hap1	Hap1	0.08697	Hap1		Hap1	Hap1	Hap1	Hap1	Hap1	Hap2			Hap1	Hap2	Hap1	Hap1	Hap1	Hap1	Hap1	Hap2	Hap1	Hap2	Hap1	0.0168829	Hap1	Hap1	Hap1	Hap1	Hap1	Hap1	Hap1
D211	japonica	Jiangsu, China	82	9.53333	0.19	Hap1	Hap1		Hap1			Hap1		Hap1	Hap1	Hap2	Hap1		Hap1	Hap2	Hap1	Hap1		Hap1	Hap1	Hap2	Hap1		Hap1			Hap1	Hap1	Hap1	Hap1	Hap1	Hap1
D212	japonica	Jiangsu, China	70	11.9	0.225	Hap1	Hap1	0.144851	Hap1		Hap1	Hap1	Hap1	Hap1	Hap1	Hap2			Hap1	Hap2	Hap1	Hap1	Hap1	Hap1	Hap1	Hap2	Hap1	Hap2	Hap1	0.0373705		Hap1	Hap1	Hap1	Hap1	Hap1
D213	japonica	Zhejiang, China	78	11.1333	0.166667	Hap1	Hap1	0.0619716	Hap1		Hap1	Hap1	Hap1		Hap1	Hap2	Hap1	0.0150546	Hap1	Hap2	Hap1	Hap1				Hap2	Hap1	Hap2	Hap1	0.0150546		Hap1			Hap1	Hap1	Hap1
D214	japonica	Taiwan, China	84	14.5333	0.213333	Hap1	Hap1		Hap1			Hap1	Hap1	Hap1	Hap1	Hap2	Hap1		Hap1	Hap2	Hap1	Hap1	Hap1	Hap1	Hap1	Hap2	Hap1		Hap1			Hap1	Hap1	Hap1	Hap1	Hap1	Hap1
D215	japonica	Zhejiang, China	64	15.4	0.28	Hap1	Hap1	0.0403006	Hap1		Hap1	Hap1	Hap1			Hap2	Hap1		Hap1	Hap2	Hap1	Hap1			Hap1	Hap2	Hap1		Hap1			Hap1		Hap1	Hap1	Hap1	Hap1
D216	japonica	Heilongjiang, China	76	14.7333	0.17	Hap1	Hap1	0.0217051	Hap1		Hap1		Hap1			Hap2	Hap1			Hap2	Hap1	Hap1			Hap1	Hap2	Hap1	Hap2	Hap1			Hap1	Hap1	Hap1	Hap1	Hap1	Hap1
D217	japonica	Japan	36	NA	NA	Hap1	Hap1	0.0121527	Hap1	0.0124668	Hap1	Hap1	Hap1	Hap1	Hap1	Hap2	Hap1		Hap1	Hap2	Hap1	Hap1	Hap1	Hap1	Hap1	Hap2	Hap1	Hap2	Hap1				Hap1	Hap1	Hap1	Hap1	Hap1
D218	japonica	Zhejiang, China	78	12.2	0.193333	Hap1	Hap1		Hap1	0.012778	Hap1	Hap1	Hap1		Hap1	Hap2	Hap1		Hap1	Hap2	Hap1	Hap1	Hap1	Hap1	Hap1	Hap2	Hap1	Hap2				Hap1	Hap1	Hap1	Hap1	Hap1	Hap1
D219	japonica	Jiangsu, China	58	11.5	0.216667	Hap1	Hap1	0.0104187	Hap1	0.0135992	Hap1	Hap1	Hap1	Hap1	Hap1	Hap2	Hap1	0.0682754	Hap1	Hap2	Hap1	Hap1	Hap1	Hap1	Hap1	Hap2	Hap1	Hap2	Hap1	0.0682754			Hap1	Hap1	Hap1	Hap1	Hap1
D220	japonica	Heilongjiang, China	NA	13.8333	0.176667	Hap1	Hap1		Hap1	0.0143017		Hap1	Hap1	Hap1	Hap1	Hap2	Hap1			Hap2	Hap1	Hap1		Hap1		Hap2	Hap1	Hap2	Hap1				Hap1	Hap1	Hap1	Hap1	Hap1
D221	japonica	Jilin, China	90	10.6667	0.196667	Hap1	Hap1	0.0103992	Hap1	0.0146253		Hap1	Hap1	Hap1	Hap1				Hap1	Hap2	Hap1	Hap1	Hap1	Hap1	Hap1	Hap2	Hap1				Hap1	Hap1	Hap1	Hap1	Hap1	Hap1	Hap1
D222	japonica	Zhejiang, China	92	11.1333	0.243333				Hap1	0.0192537		Hap1	Hap1						Hap1	Hap2	Hap1	Hap1			Hap1	Hap2	Hap1		Hap1			Hap1		Hap1	Hap1	Hap1	Hap1
D223	japonica	Jiangsu, China	48	10.9333	0.206667	Hap1	Hap1	0.0955092	Hap1	0.0252898			Hap1	Hap1	Hap1	Hap2	Hap1	0.144167	Hap1	Hap2	Hap1	Hap1	Hap1	Hap1	Hap1	Hap2	Hap1	Hap2	Hap1	0.144167				Hap1	Hap1	Hap1	Hap1
D224	japonica	Hubei, China	64	11.7	0.253333	Hap1			Hap1	0.0280619	Hap1	Hap1	Hap1	Hap1		Hap2	Hap1	0.0273389	Hap1	Hap2		Hap1			Hap1	Hap2	Hap1		Hap1	0.0273389				Hap1	Hap1		Hap1
D225	indica	Hu'nan, China	68	18.9	0.333333	Hap2	Hap2	0.0607814				Hap1	Hap1	Hap2		Hap1	Hap2	0.0796618	Hap2	Hap1	Hap1	Hap1	Hap2	Hap1	Hap1				Hap2	0.0796618		Hap1	Hap1		Hap1	Hap1	Hap1
D226	indica	Zhejiang, China	82	11.8	0.3125	Hap2	Hap2	0.083141	Hap2	0.0413425		Hap1	Hap1			Hap1	Hap2		Hap2	Hap1			Hap2	Hap1	Hap1		Hap2	Hap2	Hap2			Hap1	Hap1		Hap2	Hap1	Hap1
D227	indica	Zhejiang, China	88	14.6	0.275		Hap2	0.110597				Hap1		Hap2		Hap1	Hap2		Hap2	Hap1	Hap1	Hap1	Hap2	Hap1	Hap1		Hap2	Hap1	Hap2			Hap1	Hap1	Hap2	Hap1	Hap1	Hap1
D228	indica	Hu'nan, China	54	22.7333	0.316667	Hap2						Hap1		Hap2						Hap1	Hap2	Hap2	Hap2	Hap1	Hap1	Hap1	Hap2						Hap1	Hap1	Hap1	Hap1	Hap1
D229	indica	Fujian, China	68	18.5	0.33	Hap2					Hap2	Hap1		Hap2		Hap1	Hap2			Hap1	Hap2	Hap2	Hap2	Hap1	Hap1		Hap2	Hap1				Hap1	Hap1		Hap1	Hap1	Hap1
D230	indica	Zhejiang, China	84	12.6333	0.2175																Hap1	Hap1											Hap2		Hap1		Hap2
D231	indica	Guangdong, China	68	17.0333	0.18											Hap1					Hap1	Hap1											Hap2		Hap1		Hap2
D232	indica	Zhejiang, China	78	16.2333	0.29	Hap2			Hap2	0.0421439						Hap1				Hap1	Hap2	Hap2	Hap2	Hap1				Hap1					Hap1		Hap1	Hap1
D233	indica	Guangdong, China	66	15.1333	0.196667	Hap1	Hap2		Hap2	0.0501586			Hap1		Hap2	Hap1			Hap2	Hap1	Hap2	Hap2		Hap1	Hap2	Hap1	Hap2	Hap1	Hap2			Hap1		Hap2	Hap1	Hap1	Hap1
D234	indica	Hu'nan, China	50	13.7333	0.22							Hap2												Hap2								Hap2			Hap2	Hap2
D235	indica	Guangdong, China	90	17.4667	0.173333		Hap2					Hap1			Hap2	Hap1			Hap2			Hap2				Hap1		Hap1						Hap2	Hap2	Hap1
D236	indica	Zhejiang, China	88	15.1667	0.26	Hap1			Hap2	0.0572787			Hap1				Hap2		Hap2		Hap2	Hap2		Hap1	Hap2	Hap1	Hap2	Hap1	Hap2			Hap1	Hap1	Hap2	Hap1	Hap1	Hap1
D237	indica	Jiangxi, China	84	15.6333	0.2525	Hap2	Hap1		Hap1	0.0580172		Hap1		Hap2		Hap1	Hap1	0.071923	Hap1	Hap2			Hap2	Hap1	Hap1		Hap2	Hap1	Hap1	0.071923		Hap1	Hap1	Hap1	Hap2	Hap1	Hap1
D238	indica	Guangdong, China	94	15.3	0.2975	Hap2	Hap2	0.0487039			Hap2	Hap1		Hap2		Hap1	Hap2	0.0156796	Hap2		Hap2	Hap2	Hap2	Hap1	Hap1		Hap2		Hap2	0.0156796		Hap1	Hap1		Hap1	Hap1
D239	indica	Hu'nan, China	80	14.6667	0.275	Hap1							Hap1	Hap1		Hap1				Hap1	Hap2	Hap2		Hap1	Hap2	Hap1	Hap2	Hap1				Hap1	Hap1		Hap1	Hap1
D240	indica	Zhejiang, China	92	12.7	0.246667		Hap2		Hap2	0.0700574	Hap2	Hap1		Hap2		Hap1			Hap2	Hap1	Hap2	Hap2	Hap2	Hap1	Hap1		Hap2	Hap1	Hap2			Hap1	Hap1	Hap2	Hap1	Hap1	Hap1
D241	indica	Guizhou, China	48	20.3667	0.31							Hap1			Hap2					Hap1	Hap1	Hap1				Hap1								Hap1	Hap1	Hap1
D242	indica	Sichuan, China	86	19.9667	0.2875	Hap2						Hap1	Hap1	Hap2						Hap1	Hap2	Hap2	Hap2	Hap1	Hap1	Hap1	Hap2						Hap1	Hap1	Hap1	Hap1
D243	indica	Guangdong, China	48	13.5333	0.186667											Hap1					Hap1	Hap1				Hap2							Hap2		Hap1		Hap2
D244	japonica	Zhejiang, China	66	13.6333	0.203333	Hap1	Hap1	0.0246188	Hap1	0.0728651	Hap1	Hap1	Hap1		Hap1	Hap2	Hap1			Hap2	Hap1	Hap1	Hap1	Hap1	Hap1	Hap2		Hap2	Hap1		Hap1	Hap1	Hap1	Hap1	Hap1	Hap1	Hap1
D245	indica	Jiangxi, China	64	25.2333	0.39											Hap1					Hap1	Hap1											Hap2		Hap1
D246	japonica	Unknown	50	16.9667	0.2675	Hap1	Hap1		Hap1	0.0749101	Hap1	Hap1	Hap1		Hap1	Hap2	Hap1			Hap2	Hap1	Hap1	Hap1	Hap1	Hap1	Hap1	Hap1	Hap2	Hap1		Hap1	Hap1	Hap1	Hap1	Hap1	Hap1	Hap1
D247	indica	Jiangxi, China	70	26.2	0.303333																Hap1	Hap1											Hap2	Hap1	Hap1		Hap2
D248	indica	Philippines	84	21.1667	0.31							Hap1		Hap2						Hap1		Hap2	Hap2	Hap1	Hap1							Hap1	Hap1		Hap1	Hap1	Hap1
D249	indica	Philippines	94	23.6667	0.415							Hap2			Hap2									Hap2											Hap2	Hap2
D250	indica	Fujian, China	80	14.9667	0.26		Hap1		Hap1	0.0771387						Hap2	Hap1		Hap1	Hap2		Hap2						Hap1	Hap1				Hap2	Hap1	Hap2
D251	japonica	America	46	16.0667	0.225							Hap1	Hap1		Hap1	Hap2	Hap1		Hap1	Hap1	Hap1	Hap1	Hap1			Hap1		Hap2			Hap1		Hap2		Hap1	Hap1	Hap1
D252	indica	Guangdong, China	90	17.4333	0.3375	Hap1	Hap2		Hap2		Hap1		Hap1		Hap2	Hap1	Hap2		Hap2	Hap1	Hap1	Hap1		Hap1	Hap2	Hap1	Hap2	Hap1	Hap2		Hap2	Hap1	Hap1		Hap1	Hap1	Hap1
D253	indica	Philippines	96	14.9333	0.29		Hap2		Hap2	0.142042	Hap3	Hap2				Hap1	Hap2		Hap2			Hap1		Hap2					Hap2		Hap1	Hap2			Hap2	Hap2
D254	indica	Yunnan, China	68	18.1	0.303333	Hap2						Hap1	Hap1	Hap1						Hap1	Hap2	Hap2		Hap1	Hap1	Hap1					Hap2	Hap1	Hap1	Hap1	Hap1	Hap1	Hap1
D255	indica	Shanxi, China	84	25.9667	0.3625	Hap2					Hap2	Hap1	Hap1	Hap2		Hap2						Hap2		Hap1	Hap1							Hap1	Hap1		Hap1	Hap1	Hap1
D256	indica	He'nan, China	92	21.1333	0.36											Hap1					Hap1	Hap1											Hap2		Hap1		Hap2
D257	indica	Sichuan, China	94	18.4333	0.284333	Hap2	Hap2		Hap2	0.123452	Hap2	Hap1	Hap1	Hap2		Hap1	Hap2		Hap2		Hap2	Hap2	Hap2	Hap1	Hap1		Hap2	Hap1	Hap2		Hap2	Hap1	Hap1		Hap1	Hap1	Hap1
D258	indica	Unknown	76	13.5333	0.245	Hap1			Hap2		Hap1	Hap1	Hap1	Hap1	Hap2	Hap1				Hap1	Hap1			Hap1	Hap1				Hap2	0.012778	Hap2	Hap1	Hap1	Hap2	Hap1	Hap1	Hap1
D259	japonica	Jiangsu, China	84	11.9667	0.23		Hap1		Hap1			Hap1			Hap1	Hap2	Hap1		Hap1	Hap2			Hap1			Hap2	Hap1		Hap1			Hap1	Hap1	Hap1	Hap1		Hap1
D260	japonica	Japan	70	8.4	0.14	Hap1	Hap1		Hap1		Hap1	Hap1	Hap1	Hap1	Hap1	Hap2	Hap1		Hap1	Hap2	Hap1	Hap1	Hap1	Hap1	Hap1	Hap2	Hap1	Hap2	Hap1		Hap1	Hap1	Hap1	Hap1	Hap1	Hap1	Hap1
D261	indica	Taiwan, China	82	12.8333	0.2625	Hap2	Hap2		Hap2		Hap2	Hap1	Hap1	Hap2		Hap1	Hap2	0.0280619	Hap2	Hap1	Hap2	Hap2	Hap2	Hap1	Hap1	Hap1		Hap1	Hap2	0.0280619	Hap2	Hap1	Hap1	Hap2	Hap1	Hap1	Hap1
D262	indica	Zhejiang, China	54	14.4333	0.32	Hap1	Hap2	0.0224544	Hap2		Hap1		Hap1		Hap2	Hap1	Hap2	0.0572787	Hap2	Hap1		Hap2		Hap1	Hap2	Hap1		Hap1	Hap2	0.0572787		Hap1	Hap1	Hap2	Hap2	Hap1	Hap1
D263	japonica	Yunnan, China	48	15.4333	0.203333											Hap2					Hap1	Hap1											Hap2		Hap1		Hap2
D264	japonica	Yunnan, China	86	18.1333	0.2875	Hap1			Hap1		Hap1	Hap1	Hap1	Hap1	Hap1	Hap2	Hap1		Hap1	Hap2	Hap1	Hap1	Hap1	Hap1	Hap1			Hap2			Hap1	Hap1	Hap1	Hap1	Hap1	Hap1	Hap1
D265	indica	Guangdong, China	78	20.5	0.253333	Hap1	Hap2		Hap2		Hap1		Hap1		Hap2	Hap1	Hap2	0.123452	Hap2	Hap1		Hap1		Hap1	Hap2	Hap1		Hap1	Hap2	0.123452	Hap2	Hap1	Hap1	Hap2	Hap1	Hap1	Hap1
D266	indica	Guangdong, China	82	14	0.23	Hap1					Hap1		Hap1		Hap2	Hap1					Hap1	Hap1		Hap1	Hap2	Hap1	Hap2	Hap1				Hap1	Hap1		Hap1	Hap1	Hap1
D267	japonica	Jiangsu, China	58	13.6333	0.213333	Hap1	Hap1	0.0304389	Hap1		Hap1	Hap1	Hap1	Hap1	Hap1	Hap2	Hap1	0.013298	Hap1	Hap2	Hap1	Hap1	Hap1	Hap1	Hap1	Hap2	Hap1	Hap2	Hap1	0.013298	Hap1	Hap1	Hap1	Hap1	Hap1	Hap1	Hap1
D268	japonica	Unknown	56	17.9	0.296667						Hap1	Hap1	Hap1			Hap2	Hap1		Hap1		Hap1	Hap1				Hap2					Hap1				Hap1	Hap1	Hap1
D269	indica	Guangdong, China	84	17.9667	0.276667		Hap2		Hap2							Hap1			Hap2	Hap1								Hap1					Hap2		Hap2		Hap2
D270	japonica	Zhejiang, China	84	11.1667	0.2525	Hap1	Hap1		Hap1		Hap1	Hap1	Hap1			Hap2	Hap1	0.0129552	Hap1	Hap2	Hap1	Hap1			Hap1	Hap2	Hap1		Hap1	0.0129552	Hap1	Hap1		Hap1	Hap1	Hap1	Hap1
D271	indica	Fujian, China	72	15.2667	0.29	Hap2	Hap2		Hap2		Hap2	Hap1	Hap1	Hap2		Hap1	Hap2		Hap2	Hap1	Hap2	Hap2	Hap2	Hap1	Hap1		Hap2	Hap1	Hap2		Hap2	Hap1	Hap1	Hap2	Hap1	Hap1	Hap1
D272	indica	Jiangsu, China	80	14.6667	0.383333	Hap1			Hap2		Hap1		Hap1		Hap2	Hap1	Hap2	0.310528	Hap2	Hap1	Hap1	Hap1		Hap1	Hap2	Hap1	Hap1	Hap1	Hap2	0.310528	Hap2	Hap1	Hap1	Hap2	Hap1	Hap1	Hap1
D273	indica	Guangdong, China	88	14.2	0.21											Hap1					Hap1	Hap1											Hap2		Hap1		Hap2
D274	indica	Fujian, China	76	11.2667	0.243333	Hap2	Hap2	0.0201425	Hap2		Hap2	Hap1	Hap1	Hap2		Hap1				Hap1	Hap2	Hap2	Hap2	Hap1	Hap1		Hap2	Hap1	Hap2		Hap2	Hap1	Hap1		Hap1	Hap1	Hap1
D275	indica	Hubei, China	88	18.8	0.33	Hap2						Hap1	Hap1	Hap2						Hap1	Hap2	Hap2	Hap2											Hap1	Hap1	Hap1
D276	indica	Fujian, China	60	17.1333	0.3675		Hap2		Hap2							Hap1	Hap2		Hap2	Hap1		Hap2					Hap2	Hap1	Hap2				Hap2	Hap2	Hap1		Hap2
D277	indica	Fujian, China	86	15.5	0.236667		Hap1		Hap1							Hap2	Hap1		Hap1	Hap2	Hap2	Hap2					Hap2	Hap1	Hap1				Hap2	Hap1	Hap1		Hap2
D278	indica	Taiwan, China	86	15.4333	0.34						Hap2	Hap1	Hap1	Hap2		Hap1	Hap2	0.0130084		Hap1	Hap2	Hap2	Hap2	Hap1	Hap1		Hap2	Hap1			Hap2		Hap1		Hap1	Hap1	Hap1
D279	indica	Hu'nan, China	62	14	0.19	Hap1					Hap1	Hap1			Hap2	Hap1	Hap2	0.194712		Hap1	Hap2	Hap2			Hap1	Hap1	Hap2	Hap1			Hap2	Hap1	Hap1		Hap1	Hap1
D280	japonica	Jiangsu, China	34	NA	NA						Hap1	Hap1	Hap1		Hap1	Hap2					Hap1	Hap1	Hap1	Hap1	Hap1	Hap2	Hap1				Hap1	Hap1	Hap1		Hap1	Hap1	Hap1
D281	japonica	Yunnan, China	72	16.4667	0.323333														Hap1		Hap1	Hap1				Hap2	Hap1								Hap1
D282	indica	Fujian, China	62	19.6667	0.25							Hap1		Hap2		Hap1					Hap2	Hap2		Hap1	Hap1										Hap1
D283	indica	Fujian, China	68	17.3667	0.3425						Hap3	Hap2	Hap2			Hap1	Hap2		Hap2	Hap1		Hap1		Hap2				Hap1			Hap1	Hap2			Hap2	Hap2
D284	indica	Guangdong, China	6	NA	NA		Hap2	0.145382	Hap2		Hap1	Hap1			Hap2	Hap1	Hap2	0.176622	Hap2	Hap1						Hap1		Hap1	Hap2	0.176622	Hap2			Hap2	Hap2	Hap1
D285	indica	Anhui, China	82	18.0333	0.32		Hap2	0.00734522	Hap2							Hap1	Hap2	0.0192537	Hap2	Hap1	Hap2	Hap2					Hap2	Hap1	Hap2	0.0192537			Hap2	Hap2	Hap1		Hap2
D286	indica	Philippines	22	NA	NA	Hap1	Hap2		Hap2		Hap1		Hap1		Hap2	Hap1				Hap1		Hap2		Hap1	Hap2	Hap1		Hap1	Hap2		Hap2	Hap1	Hap1	Hap2	Hap2	Hap1	Hap1
D287	indica	Philippines	90	14.9	0.226667	Hap2	Hap2	0.0615762	Hap2		Hap2	Hap1	Hap1	Hap2	Hap2	Hap1	Hap2		Hap2	Hap1	Hap2	Hap2		Hap1	Hap1			Hap1	Hap2		Hap2	Hap1	Hap1	Hap2	Hap1	Hap1
D288	japonica	Japan	70	17.1333	0.26	Hap1	Hap1		Hap1		Hap1	Hap1	Hap1	Hap1	Hap1	Hap2	Hap1		Hap1	Hap2	Hap1	Hap1	Hap1	Hap1	Hap1	Hap2	Hap1	Hap2	Hap1		Hap1	Hap1	Hap1	Hap1	Hap1	Hap1	Hap1
D289	indica	Guyana	34	NA	NA		Hap2	0.106366	Hap2						Hap2	Hap1			Hap2		Hap1	Hap1				Hap1			Hap2	0.232212	Hap2				Hap1
D290	indica	Sichuan, China	66	15.1	0.27	Hap1	Hap2		Hap2		Hap1		Hap1		Hap2	Hap1	Hap2		Hap2	Hap1		Hap2		Hap1	Hap2	Hap1		Hap1	Hap2		Hap2	Hap1	Hap1		Hap2	Hap1	Hap1
D291	indica	Guangxi, China	80	13.7667	0.245		Hap2	0.021186	Hap2							Hap1	Hap2	0.0421439	Hap2	Hap1	Hap1	Hap1						Hap1	Hap2	0.0421439			Hap2	Hap2	Hap1		Hap2
D292	indica	Fujian, China	78	15.6	0.296667	Hap2	Hap1		Hap1		Hap2	Hap1	Hap1	Hap2		Hap2	Hap1		Hap1	Hap2	Hap2	Hap2	Hap2	Hap1	Hap1	Hap1	Hap2	Hap2	Hap1		Hap2	Hap1	Hap1	Hap1	Hap1	Hap1	Hap1
D293	indica	India	50	15.8	0.25	Hap1					Hap1		Hap1		Hap2	Hap1					Hap2	Hap2		Hap1	Hap2	Hap1		Hap1			Hap2	Hap1	Hap1		Hap1	Hap1	Hap1
D294	indica	Philippines	60	19.0333	0.246667		Hap2	0.161505	Hap2		Hap3	Hap2	Hap2		Hap2	Hap1	Hap2	0.0749101	Hap2			Hap2		Hap2				Hap1	Hap2	0.0749101	Hap2	Hap2			Hap2	Hap2
D295	japonica	Yunnan, China	80	15.5667	0.24		Hap1		Hap1							Hap2	Hap1		Hap1	Hap2	Hap1	Hap1	Hap1		Hap1	Hap2	Hap1		Hap1		Hap1	Hap1		Hap1	Hap1	Hap1
D296	japonica	Liaoning, China	52	11.4	0.193333	Hap1	Hap1	0.125505	Hap1		Hap1	Hap1	Hap1	Hap1	Hap2	Hap2	Hap1	0.0327227	Hap1	Hap2	Hap1	Hap1	Hap1		Hap1	Hap1	Hap1	Hap2	Hap1	0.0327227		Hap1	Hap1	Hap1	Hap1	Hap1	Hap1
D297	japonica	Jiangsu, China	56	14.6667	0.263333	Hap1	Hap1		Hap1		Hap1	Hap1	Hap1			Hap2	Hap1		Hap1	Hap2	Hap1	Hap1			Hap1	Hap2	Hap1	Hap2	Hap1		Hap1	Hap1		Hap1	Hap1	Hap1	Hap1
D298	indica	Yunnan, China	50	13.9667	0.295	Hap1			Hap2		Hap1		Hap1		Hap2	Hap1	Hap2		Hap2	Hap1	Hap2	Hap2		Hap1	Hap2	Hap1		Hap1	Hap2		Hap2	Hap1	Hap1		Hap1	Hap1	Hap1
D299	indica	North Korea	56	NA	NA	Hap1			Hap2		Hap1		Hap1		Hap2	Hap1	Hap2		Hap2					Hap1	Hap2	Hap1			Hap2		Hap2	Hap1	Hap1		Hap2	Hap1	Hap1
D300	japonica	Japan	66	10.6667	0.213333	Hap1	Hap1		Hap1		Hap1	Hap1	Hap1	Hap1	Hap1	Hap2	Hap1		Hap1	Hap2	Hap1	Hap1	Hap1	Hap1	Hap1	Hap2	Hap1	Hap2	Hap1		Hap1	Hap1	Hap1	Hap1	Hap1	Hap1	Hap1
D301	japonica	Heilongjiang, China	68	13.7333	0.183333	Hap1	Hap1	0.0224133	Hap1		Hap1		Hap1		Hap1	Hap2	Hap1	0.0162439	Hap1	Hap2	Hap1	Hap1			Hap1	Hap2	Hap1	Hap2	Hap1	0.0162439	Hap1	Hap1	Hap1	Hap1	Hap1	Hap1	Hap1
D302	japonica	Heilongjiang, China	66	12.3667	0.22	Hap1	Hap1		Hap1		Hap1		Hap1		Hap1	Hap2	Hap1		Hap1	Hap2	Hap1	Hap1			Hap1	Hap2	Hap1	Hap2	Hap1		Hap1	Hap1	Hap1	Hap1	Hap1	Hap1	Hap1
D303	japonica	Anhui, China	70	17.8	0.263333	Hap1	Hap1		Hap1		Hap1	Hap1	Hap1	Hap1	Hap1	Hap2	Hap1		Hap1	Hap2	Hap1	Hap1	Hap1	Hap1	Hap1	Hap2	Hap1	Hap2	Hap1		Hap1	Hap1	Hap1	Hap1	Hap1	Hap1	Hap1
D304	japonica	Yunnan, China	74	11.9	0.176667	Hap1			Hap1		Hap1	Hap1	Hap1	Hap1	Hap1	Hap2	Hap1		Hap1	Hap2	Hap1	Hap1	Hap1	Hap1	Hap1	Hap2	Hap1	Hap2			Hap1	Hap1	Hap1	Hap1	Hap1	Hap1	Hap1
D305	japonica	Yunnan, China	100	13.2	0.266667	Hap1	Hap1		Hap1		Hap1	Hap1	Hap1	Hap1	Hap1	Hap2	Hap1		Hap1	Hap2	Hap1	Hap1	Hap1	Hap1	Hap1	Hap2	Hap1		Hap1		Hap1	Hap1	Hap1	Hap1	Hap1	Hap1	Hap1
D306	indica	Jiangxi, China	78	14.7667	0.2225											Hap1						Hap2					Hap2	Hap1							Hap1
D307	indica	Sichuan, China	70	10.1333	0.213333	Hap2			Hap1			Hap1		Hap1		Hap2	Hap1		Hap1	Hap2	Hap2	Hap2		Hap1	Hap1			Hap2			Hap2	Hap1	Hap1	Hap1	Hap1	Hap1	Hap1
D308	indica	Zhejiang, China	82	16.1333	0.2825		Hap1		Hap1							Hap2	Hap1		Hap1	Hap2	Hap2	Hap2					Hap2	Hap2	Hap1				Hap2	Hap1	Hap1		Hap2
D309	japonica	Unknown	70	10.4667	0.18	Hap1	Hap1	0.178142	Hap1		Hap1	Hap1	Hap1	Hap1	Hap1	Hap2	Hap1	0.0268656	Hap1	Hap2	Hap1	Hap1	Hap1	Hap1	Hap1	Hap2	Hap1	Hap2	Hap1	0.0268656	Hap1	Hap1	Hap1	Hap1	Hap1	Hap1	Hap1
D310	japonica	Zhejiang, China	78	10.5	0.1575	Hap1	Hap1		Hap1		Hap1	Hap1	Hap1			Hap2	Hap1		Hap1	Hap2	Hap1	Hap1			Hap1	Hap2	Hap1		Hap1		Hap1	Hap1		Hap1	Hap1	Hap1	Hap1
D311	indica	Zhejiang, China	86	13.6333	0.23	Hap1	Hap2		Hap2		Hap1		Hap1		Hap2	Hap1			Hap2	Hap1		Hap2		Hap1	Hap2	Hap1	Hap2	Hap1	Hap2		Hap2	Hap1	Hap1		Hap1	Hap1	Hap1
D312	indica	Guangdong, China	44	15.1667	0.215	Hap2	Hap2		Hap2		Hap1	Hap1	Hap1	Hap2		Hap1	Hap2		Hap2	Hap1	Hap1	Hap1	Hap2	Hap1	Hap1		Hap2	Hap1	Hap2		Hap2	Hap1	Hap1	Hap2	Hap1	Hap1	Hap1
D313	indica	Philippines	44	10.3	0.17	Hap2	Hap2		Hap2		Hap2	Hap1	Hap1	Hap2	Hap2	Hap1	Hap2		Hap2	Hap1				Hap1	Hap1			Hap1	Hap2		Hap2	Hap1	Hap1	Hap2	Hap2	Hap1
D314	indica	Philippines	80	17.3333	0.3525						Hap3	Hap2	Hap2			Hap2	Hap1		Hap1					Hap2								Hap2			Hap2	Hap2
D315	japonica	Unknown	86	14.1	0.25	Hap1	Hap1		Hap1		Hap1	Hap1	Hap1	Hap1	Hap1	Hap2	Hap1		Hap1	Hap2	Hap1	Hap1	Hap1	Hap1	Hap1	Hap2	Hap1	Hap2	Hap1		Hap1	Hap1	Hap1	Hap1	Hap1	Hap1	Hap1
D316	indica	Fujian, China	24	NA	NA		Hap2	0.29448	Hap2						Hap2	Hap1	Hap2		Hap2	Hap1	Hap1	Hap1				Hap1		Hap1	Hap2					Hap2	Hap1
D317	indica	Unknown	96	9.63333	0.225	Hap2					Hap2	Hap1	Hap1	Hap2		Hap1	Hap2			Hap1	Hap2	Hap2	Hap2	Hap1	Hap1			Hap1			Hap2	Hap1	Hap1		Hap1	Hap1	Hap1
D318	japonica	Unknown	84	15.5	0.243333	Hap1	Hap1		Hap1		Hap1	Hap1	Hap1	Hap1	Hap1	Hap2	Hap1		Hap1	Hap2	Hap1	Hap1	Hap1	Hap1	Hap1	Hap2	Hap1	Hap2	Hap1		Hap1	Hap1	Hap1	Hap1	Hap1	Hap1	Hap1
D319	japonica	Jiangxi, China	60	12.7667	0.18	Hap1	Hap1		Hap1		Hap1	Hap1	Hap1	Hap1	Hap1	Hap2	Hap1		Hap1	Hap2	Hap1	Hap1	Hap1	Hap1	Hap1	Hap2	Hap1	Hap2	Hap1		Hap1	Hap1	Hap1	Hap1	Hap1	Hap1	Hap1
D320	indica	Guangdong, China	56	13.8333	0.18		Hap2				Hap1				Hap2	Hap1	Hap2	0.0291114	Hap2	Hap1						Hap1	Hap2	Hap1	Hap2	0.0291114	Hap2					Hap1
D321	indica	Guangdong, China	70	12.2	0.22	Hap2					Hap2	Hap1	Hap1	Hap2	Hap2	Hap1	Hap2			Hap1	Hap1	Hap1		Hap1	Hap1			Hap1			Hap2	Hap1	Hap1		Hap1	Hap1
D322	japonica	Zhejiang, China	90	14.2	0.265	Hap1	Hap1		Hap1		Hap1	Hap1	Hap1	Hap1	Hap1	Hap2	Hap1		Hap1	Hap2	Hap1	Hap1	Hap1	Hap1	Hap1	Hap2	Hap1	Hap2	Hap1		Hap1	Hap1	Hap1	Hap1	Hap1	Hap1	Hap1
D323	indica	Jiangxi, China	70	13.8333	0.266667	Hap2	Hap2		Hap2		Hap2	Hap1		Hap2		Hap1	Hap2	0.0135992	Hap2	Hap1		Hap2	Hap2	Hap1	Hap1	Hap1		Hap1	Hap2	0.0135992	Hap2	Hap1	Hap1	Hap2	Hap2	Hap1	Hap1
D324	japonica	Liaoning, China	68	15.9667	0.28	Hap1	Hap1	0.0651585	Hap1		Hap1		Hap1		Hap2	Hap2	Hap1	0.141394	Hap1	Hap2	Hap1	Hap1		Hap1	Hap2	Hap1	Hap1	Hap2	Hap1	0.141394	Hap2	Hap1	Hap1	Hap1	Hap1	Hap1	Hap1
D325	indica	Philippines	26	NA	NA	Hap1	Hap2	0.0453473			Hap1		Hap1		Hap2	Hap1	Hap2	0.198437	Hap2	Hap1				Hap1	Hap2	Hap1		Hap1	Hap2	0.198437	Hap2	Hap1	Hap1	Hap2	Hap1	Hap1	Hap1
D326	indica	Philippines	52	8.86667	0.1325		Hap2		Hap2		Hap2	Hap1	Hap1	Hap2	Hap2	Hap1	Hap2	0.0700574	Hap2	Hap1	Hap2	Hap2		Hap1	Hap1			Hap1	Hap2	0.0700574	Hap2	Hap1	Hap1	Hap2	Hap1	Hap1
D327	indica	Philippines	40	10.7	0.253333	Hap1	Hap2		Hap2		Hap1		Hap1		Hap2	Hap1	Hap2		Hap2	Hap1				Hap1	Hap2	Hap1		Hap1	Hap2		Hap2	Hap1	Hap1	Hap2	Hap1	Hap1	Hap1
D328	indica	Philippines	76	19.1333	0.266667		Hap2	0.0576956	Hap2		Hap3	Hap2	Hap2			Hap1	Hap2		Hap2		Hap2	Hap2		Hap2					Hap2		Hap1	Hap2			Hap1	Hap2
D329	indica	Philippines	62	13.4667	0.163333	Hap2	Hap2		Hap2		Hap2	Hap1	Hap1	Hap2	Hap2	Hap1	Hap2		Hap2	Hap1	Hap2	Hap2		Hap1	Hap1			Hap1	Hap2		Hap2	Hap1	Hap1	Hap2	Hap1	Hap1
D330	indica	Philippines	94	16	0.285		Hap2				Hap3	Hap2	Hap2			Hap1	Hap2		Hap2	Hap1	Hap2	Hap2		Hap2				Hap1	Hap2		Hap1	Hap2			Hap1	Hap2
D331	indica	Philippines	56	16.0667	0.256667		Hap2				Hap2	Hap1	Hap1	Hap2	Hap2	Hap1			Hap2	Hap1	Hap2	Hap2		Hap1	Hap1			Hap1	Hap2		Hap2	Hap1	Hap1	Hap2	Hap1	Hap1
D332	indica	Philippines	78	16.4	0.2475		Hap2		Hap2		Hap3	Hap2	Hap2			Hap1	Hap2		Hap2	Hap1				Hap2				Hap1	Hap2		Hap1	Hap2		Hap2	Hap2	Hap2
D333	indica	Philippines	22	NA	NA	Hap1	Hap2				Hap1		Hap1		Hap2	Hap1	Hap2		Hap2	Hap1	Hap2	Hap2		Hap1	Hap2	Hap1		Hap1	Hap2		Hap2	Hap1	Hap1	Hap2	Hap1	Hap1	Hap1
D334	indica	Philippines	78	12.9333	0.133333		Hap2		Hap2		Hap3	Hap2				Hap1	Hap2		Hap2	Hap1	Hap2	Hap2		Hap2				Hap1	Hap2		Hap1	Hap2		Hap2		Hap2
D335	indica	Unknown	84	15.9	0.2325		Hap2		Hap2		Hap3	Hap2	Hap2			Hap1	Hap2		Hap2					Hap2					Hap2		Hap1	Hap2			Hap2	Hap2
D336	indica	Philippines	80	15.8333	0.26		Hap2		Hap2		Hap3	Hap2	Hap2			Hap1	Hap2		Hap2					Hap2					Hap2		Hap1	Hap2			Hap2	Hap2
D337	indica	Thailand	42	11.3667	0.206667		Hap2				Hap1	Hap1			Hap2	Hap1	Hap2									Hap1					Hap2				Hap1	Hap1
D338	indica	Unknown	14	NA	NA						Hap1	Hap1			Hap2	Hap1										Hap1					Hap2				Hap2	Hap1
D339	indica	Unknown	88	15.4333	0.24						Hap3	Hap2	Hap2			Hap1	Hap2		Hap2					Hap2					Hap2		Hap1	Hap2			Hap2	Hap2
D340	indica	North Korea	60	13.9667	0.213333		Hap2		Hap2		Hap1	Hap1				Hap1			Hap2	Hap1	Hap1	Hap1						Hap1	Hap2						Hap1	Hap1
D341	indica	Unknown	88	17.5667	0.226667	Hap1	Hap2		Hap2		Hap1		Hap1		Hap2	Hap1	Hap2		Hap2	Hap1				Hap1	Hap2	Hap1		Hap1	Hap2		Hap2	Hap1	Hap1		Hap1	Hap1	Hap1
D342	indica	Unknown	60	14.9333	0.186667		Hap2		Hap2		Hap3	Hap2	Hap2			Hap1	Hap2		Hap2	Hap1	Hap2	Hap2		Hap2				Hap1	Hap2		Hap1	Hap2			Hap1	Hap2
D343	indica	Unknown	56	15.5333	0.22	Hap2					Hap2	Hap1	Hap1	Hap2	Hap2	Hap1	Hap2				Hap1			Hap1	Hap1	Hap1		Hap1			Hap2	Hap1	Hap1		Hap1	Hap1
D344	indica	Unknown	80	18.0333	0.283333		Hap2		Hap2			Hap2	Hap2			Hap1	Hap2		Hap2					Hap2					Hap2		Hap1	Hap2			Hap2	Hap2
D345	indica	Unknown	42	9.03333	0.22	Hap1					Hap1				Hap2	Hap1					Hap2	Hap2		Hap1	Hap2	Hap1					Hap2	Hap1	Hap1		Hap1	Hap1	Hap1
D346	indica	Guangdong, China	82	19.8	0.2825						Hap3	Hap2	Hap2								Hap1	Hap1		Hap2								Hap2			Hap1	Hap2
NA: represents the missing data

## Sheet: Table S2
Supplementary Table 2 Summary of significant SNPs detected by GWAS.
QTL	Trait	SNPa	Chr.	Peak positionb (Mb)	p-value	-log10 (P)	R2 (%)	Allele	MAF
qGR1-1	GR	rs1_5889847	1	5889847	2.87591e-07	6.54123	7.89624	T/C	0.05
		rs1_5889879	1	5889879	3.63387e-07	6.43963	7.75566	T/C	0.051
		rs1_5893821	1	5893821	2.87656e-07	6.54113	7.89611	A/T	0.053
		rs1_5916214	1	5916214	2.88006e-07	6.5406	7.89537	A/G	0.05
		rs1_5967790	1	5967790	2.2118e-07	6.65525	8.05435	T/C	0.053
		rs1_5976951	1	5976951	3.28726e-07	6.48317	7.81587	A/G	0.051
		rs1_5990942	1	5990942	3.90359e-09	8.40854	10.5253	T/C	0.05
		rs1_5991311	1	5991311	2.61011e-07	6.58334	7.9546	T/C	0.05
		rs1_6016097	1	6016097	1.24405e-07	6.90516	8.40199	T/C	0.052
		rs1_6024612	1	6024612	1.24405e-07	6.90516	8.40199	A/G	0.052
		rs1_6031005	1	6031005	7.74208e-08	7.11114	8.68969	T/C	0.05
		rs1_6038556	1	6038556	3.20902e-07	6.49363	7.83035	T/G	0.051
		rs1_6041290	1	6041290	1.24405e-07	6.90516	8.40199	G/A	0.052
		rs1_6055127	1	6055127	2.84438e-07	6.54601	7.90287	C/T	0.05
		rs1_6055803	1	6055803	3.3943e-07	6.46925	7.79662	C/T	0.055
		rs1_6055817	1	6055817	2.88006e-07	6.5406	7.89537	C/T	0.05
		rs1_6055857	1	6055857	2.52494e-07	6.59775	7.97458	A/G	0.05
		rs1_6429529	1	6429529	1.52642e-07	6.81633	8.27823	A/G	0.111
qSL1-1	SL	rs1_30735752	1	30735752	2.92028e-07	6.53458	7.91708	G/A	0.102
		rs1_30735754	1	30735754	2.92028e-07	6.53458	7.91708	T/A	0.102
qSL1-2		rs1_31506390	1	31506390	1.43936e-07	6.84183	8.34703	T/C	0.09
		rs1_31534121	1	31534121	3.64314e-07	6.43852	7.78321	A/G	0.075
		rs1_31754183	1	31754183	2.45687e-07	6.60962	8.02185	A/G	0.113
		rs1_31754208	1	31754208	2.45687e-07	6.60962	8.02185	T/C	0.113
		rs1_31763498	1	31763498	2.45687e-07	6.60962	8.02185	C/A	0.113
		rs1_31777870	1	31777870	2.45687e-07	6.60962	8.02185	A/G	0.113
		rs1_32114784	1	32114784	2.9106e-08	7.53602	9.32767	C/T	0.088
		rs1_32115146	1	32115146	7.32134e-08	7.13541	8.7602	T/C	0.099
		rs1_32115712	1	32115712	1.69854e-07	6.76992	8.24618	A/G	0.097
		rs1_32118778	1	32118778	2.14424e-07	6.66873	8.10449	T/C	0.079
		rs1_32121240	1	32121240	2.33672e-07	6.63139	8.05229	A/G	0.085
		rs1_32122943	1	32122943	1.91645e-07	6.7175	8.17274	A/G	0.108
		rs1_32124237	1	32124237	1.01145e-07	6.99506	8.56238	A/C	0.11
		rs1_32124457	1	32124457	1.01145e-07	6.99506	8.56238	A/G	0.11
		rs1_32125256	1	32125256	1.91645e-07	6.7175	8.17274	T/C	0.108
		rs1_32125556	1	32125556	1.91645e-07	6.7175	8.17274	G/T	0.108
		rs1_32128238	1	32128238	6.43775e-08	7.19127	8.83907	T/C	0.108
		rs1_32129202	1	32129202	5.56801e-08	7.2543	8.92818	T/C	0.108
		rs1_32129254	1	32129254	5.56801e-08	7.2543	8.92818	T/A	0.108
		rs1_32129561	1	32129561	2.57287e-07	6.58958	7.99386	G/A	0.108
		rs1_32130363	1	32130363	1.91645e-07	6.7175	8.17274	T/A	0.108
		rs1_32131759	1	32131759	1.51967e-07	6.81825	8.31394	C/T	0.071
		rs1_32132140	1	32132140	1.43891e-07	6.84197	8.34722	A/G	0.107
		rs1_32133124	1	32133124	1.91645e-07	6.7175	8.17274	T/A	0.108
		rs1_32135445	1	32135445	9.58801e-08	7.01827	8.59508	T/C	0.11
		rs1_32136270	1	32136270	1.20923e-07	6.91749	8.45329	A/G	0.112
		rs1_32138438	1	32138438	3.20223e-07	6.49455	7.86126	A/T	0.107
		rs1_32139392	1	32139392	1.56774e-07	6.80473	8.29498	A/T	0.107
qFW1-1	FW	rs1_13579050	1	13579050	3.13962e-08	7.50312	9.28242	G/A	0.395
qFW4-1		rs4_20456553	4	20456553	2.64593e-07	6.57742	7.978	G/A	0.426
qFW7-1		rs7_20602053	7	20602053	4.15679e-08	7.38124	9.10938	T/C	0.053
Note: MAF means minor allele frequency.
aThe SNP positions were based on the NPB reference genome (IRGSP-1.0).
bPosition of the SNP showing the most significant associationn for seed vigor.

## Sheet: Table S3
Supplementary Table 3 List of 540 candidate genes in GWAS regions.
No.	Trait	QTL	Gene ID	Chromosome	Start	End	Annotation	Expression
								Leaf	Seed
1	GR	qGR1-1	LOC_Os01g10650	Chr1	5689889	5690347	hypothetical protein	0	0
2	GR	qGR1-1	LOC_Os01g10660	Chr1	5693664	5693990	expressed protein	0	0.076948
3	GR	qGR1-1	LOC_Os01g10670	Chr1	5695273	5695584	expressed protein	0	0
4	GR	qGR1-1	LOC_Os01g10680	Chr1	5699651	5707758	GIL1, putative, expressed	5.40161	1.41706
5	GR	qGR1-1	LOC_Os01g10690	Chr1	5718883	5724184	POLD3 - Putative DNA polymerase delta complex subunit, expressed	3.16798	2.73504
6	GR	qGR1-1	LOC_Os01g10700	Chr1	5727326	5729756	D-mannose binding lectin family protein, expressed	0.011683	0.236715
7	GR	qGR1-1	LOC_Os01g10710	Chr1	5731783	5734320	receptor-like protein kinase, putative, expressed	0	0.014392
8	GR	qGR1-1	LOC_Os01g10720	Chr1	5736299	5740751	retrotransposon protein, putative, unclassified, expressed	0	0.0268905
9	GR	qGR1-1	LOC_Os01g10740	Chr1	5748869	5749270	expressed protein	0	0
10	GR	qGR1-1	LOC_Os01g10750	Chr1	5750067	5750435	expressed protein	0	0
11	GR	qGR1-1	LOC_Os01g10760	Chr1	5750703	5751035	expressed protein	0	0
12	GR	qGR1-1	LOC_Os01g10770	Chr1	5757491	5758607	expressed protein	0.0747255	0.122952
13	GR	qGR1-1	LOC_Os01g10780	Chr1	5759818	5760234	expressed protein	0	0.0658035
14	GR	qGR1-1	LOC_Os01g10790	Chr1	5760481	5764641	WD domain, G-beta repeat domain containing protein, expressed	11.1798	5.79759
15	GR	qGR1-1	LOC_Os01g10800	Chr1	5764652	5767959	pentatricopeptide, putative, expressed	3.15666	4.97886
16	GR	qGR1-1	LOC_Os01g10810	Chr1	5768209	5769462	rho termination factor, N-terminal domain containing protein, expressed	3.59904	4.37526
17	GR	qGR1-1	LOC_Os01g10820	Chr1	5770150	5772034	ribosomal protein L5, putative, expressed	67.4153	67.3453
18	GR	qGR1-1	LOC_Os01g10830	Chr1	5773300	5774192	carnitine racemase like protein, putative, expressed	1.04761	0.188949
19	GR	qGR1-1	LOC_Os01g10840	Chr1	5774281	5778466	CGMC_GSK.2 - CGMC includes CDA, MAPK, GSK3, and CLKC kinases, expressed	20.5462	35.499
20	GR	qGR1-1	LOC_Os01g10850	Chr1	5789309	5791121	peroxidase precursor, putative, expressed	0.016683	4.44396
21	GR	qGR1-1	LOC_Os01g10860	Chr1	5794747	5797674	expressed protein	3.37722	6.13381
22	GR	qGR1-1	LOC_Os01g10870	Chr1	5799607	5801142	CAMK_KIN1/SNF1/Nim1_like.7 - CAMK includes calcium/calmodulin depedent protein kinases, expressed	0.041589	0.0009375
23	GR	qGR1-1	LOC_Os01g10880	Chr1	5808045	5808340	expressed protein	7.20482	3.92683
24	GR	qGR1-1	LOC_Os01g10890	Chr1	5809557	5811617	CAMK_KIN1/SNF1/Nim1_like.8 - CAMK includes calcium/calmodulin depedent protein kinases, expressed	17.493	9.42175
25	GR	qGR1-1	LOC_Os01g10900	Chr1	5814778	5819207	MRH1, putative, expressed	0.349087	0.40279
26	GR	qGR1-1	LOC_Os01g10910	Chr1	5820255	5822506	transposon protein, putative, unclassified, expressed	0.092205	0.048189
27	GR	qGR1-1	LOC_Os01g10920	Chr1	5823869	5828251	peptide-N4-asparagine amidase A, putative, expressed	0.034511	0.126702
28	GR	qGR1-1	LOC_Os01g10930	Chr1	5828553	5830832	peptide-N4-asparagine amidase A, putative, expressed	0.351636	2.15013
29	GR	qGR1-1	LOC_Os01g10940	Chr1	5833613	5834107	S-adenosylmethionine synthetase 2, putative, expressed	0.067989	0.113425
30	GR	qGR1-1	LOC_Os01g10950	Chr1	5837475	5839898	peptide-N4-asparagine amidase A, putative, expressed	4.0355	6.75954
31	GR	qGR1-1	LOC_Os01g10960	Chr1	5841736	5843574	peptide-N4-asparagine amidase A, putative, expressed	0.123095	0.339559
32	GR	qGR1-1	LOC_Os01g10970	Chr1	5844702	5848945	auxin-induced protein 5NG4, putative, expressed	0.001877	0
33	GR	qGR1-1	LOC_Os01g10980	Chr1	5856467	5857920	auxin-induced protein 5NG4, putative, expressed	0.179108	0.411054
34	GR	qGR1-1	LOC_Os01g10990	Chr1	5861816	5863794	integral membrane protein DUF6 containing protein, expressed	0.296039	1.12184
35	GR	qGR1-1	LOC_Os01g11000	Chr1	5865389	5869482	transposon protein, putative, unclassified, expressed
36	GR	qGR1-1	LOC_Os01g11010	Chr1	5875786	5877849	peptide-N4-asparagine amidase A, putative, expressed	0.06865	0.435517
37	GR	qGR1-1	LOC_Os01g11020	Chr1	5884006	5884572	expressed protein	0.21328	0.0005885
38	GR	qGR1-1	LOC_Os01g11040	Chr1	5890605	5898224	SCAR-like protein 2, putative, expressed	13.7033	45.8452
39	GR	qGR1-1	LOC_Os01g11054	Chr1	5899555	5909595	phosphoenolpyruvate carboxylase, putative, expressed	25.8452	21.7301
40	GR	qGR1-1	LOC_Os01g11070	Chr1	5911503	5916819	Alg9-like mannosyltransferase protein, putative, expressed	20.4445	32.412
41	GR	qGR1-1	LOC_Os01g11080	Chr1	5918163	5919212	transposable element protein, putative, containing Pfam profile: PF03732, Retrotrans_gag, expressed	0.009846	0
42	GR	qGR1-1	LOC_Os01g11110	Chr1	5921759	5934186	14-3-3 protein, putative, expressed	14.0712	11.958
43	GR	qGR1-1	LOC_Os01g11120	Chr1	5934573	5939527	CID11, putative, expressed	13.733	25.0683
44	GR	qGR1-1	LOC_Os01g11130	Chr1	5945633	5954387	RNA recognition motif containing protein, putative, expressed	0.0975125	0.54079
45	GR	qGR1-1	LOC_Os01g11140	Chr1	5961694	5965740	retrotransposon protein, putative, unclassified, expressed	0	0.0010645
46	GR	qGR1-1	LOC_Os01g11150	Chr1	5968819	5972489	gibberellin 2-beta-dioxygenase, putative, expressed	0.373283	0.154529
47	GR	qGR1-1	LOC_Os01g11160	Chr1	5983581	5985875	amino acid permease family protein, putative, expressed	5.02724	2.75012
48	GR	qGR1-1	LOC_Os01g11170	Chr1	5990953	5991834	expressed protein	0	0
49	GR	qGR1-1	LOC_Os01g11190	Chr1	5994786	5995455	expressed protein	0.043101	0.0093465
50	GR	qGR1-1	LOC_Os01g11200	Chr1	6000333	6002858	transforming protein myb, putative, expressed	0	0
51	GR	qGR1-1	LOC_Os01g11210	Chr1	6003524	6004869	expressed protein	0.120448	1.22971
52	GR	qGR1-1	LOC_Os01g11220	Chr1	6004879	6007163	hydrolase, acting on carbon-nitrogen, putative, expressed	0.049249	0.375778
53	GR	qGR1-1	LOC_Os01g11230	Chr1	6007818	6009027	SOUL heme-binding protein, putative, expressed	67.2884	90.6582
54	GR	qGR1-1	LOC_Os01g11240	Chr1	6010736	6011894	DUF538 domain containing protein, putative, expressed	64.0339	45.7769
55	GR	qGR1-1	LOC_Os01g11250	Chr1	6017742	6022156	potassium channel KAT1, putative, expressed	5.21092	5.39582
56	GR	qGR1-1	LOC_Os01g11260	Chr1	6025074	6029649	phospho-N-acetylmuramoyl-pentapeptide-transferase, putative, expressed	1.90171	4.49804
57	GR	qGR1-1	LOC_Os01g11270	Chr1	6031025	6032833	cytochrome P450, putative, expressed	0.030662	0.202303
58	GR	qGR1-1	LOC_Os01g11280	Chr1	6037423	6039070	cytochrome P450, putative, expressed	0.009686	0.043837
59	GR	qGR1-1	LOC_Os01g11300	Chr1	6057440	6059109	cytochrome P450, putative, expressed	0.015398	0.0120745
60	GR	qGR1-1	LOC_Os01g11310	Chr1	6063479	6063934	transposon protein, putative, Pong sub-class, expressed	0	0
61	GR	qGR1-1	LOC_Os01g11320	Chr1	6065683	6066478	transposon protein, putative, Pong sub-class	0.03067	0.0096605
62	GR	qGR1-1	LOC_Os01g11330	Chr1	6068798	6071736	retrotransposon protein, putative, unclassified, expressed	0.007887	0
63	GR	qGR1-1	LOC_Os01g11340	Chr1	6076688	6078711	cytochrome P450, putative, expressed	1.59767	2.23565
64	GR	qGR1-1	LOC_Os01g11350	Chr1	6094692	6096528	bZIP transcription factor domain containing protein, expressed	0.238862	1.8955
65	GR	qGR1-1	LOC_Os01g11360	Chr1	6108958	6111317	expressed protein	0.049083	1.79735
66	GR	qGR1-1	LOC_Os01g11370	Chr1	6112801	6125531	ATP-dependent RNA helicase, putative, expressed	21.4739	14.8227
67	GR	qGR1-1	LOC_Os01g11390	Chr1	6129330	6129737	expressed protein	0	0
68	GR	qGR1-1	LOC_Os01g11400	Chr1	6132290	6132533	hypothetical protein	0.622186	0.968606
69	GR	qGR1-1	LOC_Os01g11414	Chr1	6134202	6139189	sodium/calcium exchanger protein, putative, expressed	7.73364	16.894
70	GR	qGR1-1	LOC_Os01g11430	Chr1	6139582	6142129	expressed protein	0.050583	0.148491
71	GR	qGR1-1	LOC_Os01g11450	Chr1	6163187	6166385	retrotransposon protein, putative, Ty1-copia subclass, expressed	0	0
72	GR	qGR1-1	LOC_Os01g11460	Chr1	6171722	6173186	zinc finger, C3HC4 type domain containing protein, expressed	0.152219	0.566185
73	GR	qGR1-1	LOC_Os01g11470	Chr1	6182163	6182516	expressed protein	0.03753	0.057283
74	GR	qGR1-1	LOC_Os01g11480	Chr1	6183125	6183625	zinc finger, C3HC4 type domain containing protein, expressed	0.017815	0.217435
75	GR	qGR1-1	LOC_Os01g11490	Chr1	6185622	6186317	zinc finger, C3HC4 type domain containing protein, expressed	0.016581	0.0448665
76	GR	qGR1-1	LOC_Os01g11500	Chr1	6188518	6189219	zinc finger, C3HC4 type domain containing protein, expressed	0.060245	0.0380935
77	GR	qGR1-1	LOC_Os01g11510	Chr1	6191931	6193745	OsMADS91 - MADS-box family gene with M-beta type-box, expressed	0	0
78	GR	qGR1-1	LOC_Os01g11520	Chr1	6199158	6200399	RING-H2 finger protein, putative, expressed	2.06742	0.428628
79	GR	qGR1-1	LOC_Os01g11550	Chr1	6221636	6224329	TCP family transcription factor, putative, expressed	0.222407	3.24857
80	GR	qGR1-1	LOC_Os01g11570	Chr1	6242495	6244969	GDSL-like lipase/acylhydrolase, putative, expressed	16.3708	28.7281
81	GR	qGR1-1	LOC_Os01g11580	Chr1	6247411	6253398	bromodomain containing protein, expressed	17.7377	23.5845
82	GR	qGR1-1	LOC_Os01g11590	Chr1	6253721	6257198	uncharacterized protein HI0077, putative, expressed	18.5084	13.5166
83	GR	qGR1-1	LOC_Os01g11600	Chr1	6257915	6258264	expressed protein	10.2568	4.59779
84	GR	qGR1-1	LOC_Os01g11620	Chr1	6267440	6270903	GDSL-like lipase/acylhydrolase, putative, expressed	0.926304	113.532
85	GR	qGR1-1	LOC_Os01g11640	Chr1	6277478	6277714	expressed protein	0	0
86	GR	qGR1-1	LOC_Os01g11650	Chr1	6278493	6283652	GDSL-like lipase/acylhydrolase, putative, expressed	18.5681	28.4903
87	GR	qGR1-1	LOC_Os01g11660	Chr1	6288365	6292303	GDSL-like lipase/acylhydrolase, putative, expressed	1.4133	4.52939
88	GR	qGR1-1	LOC_Os01g11670	Chr1	6295991	6297676	OsSCP2 - Putative Serine Carboxypeptidase homologue, expressed	0.72793	0.540434
89	GR	qGR1-1	LOC_Os01g11680	Chr1	6298944	6301397	transposon protein, putative, unclassified, expressed	0.024082	0.029088
90	GR	qGR1-1	LOC_Os01g11690	Chr1	6303562	6303822	expressed protein	0.051586	0.057773
91	GR	qGR1-1	LOC_Os01g11700	Chr1	6304802	6306608	GDSL-like lipase/acylhydrolase, putative, expressed	0.042245	3.52617
92	GR	qGR1-1	LOC_Os01g11704	Chr1	6311934	6313649	hypothetical protein	0	0.050756
93	GR	qGR1-1	LOC_Os01g11710	Chr1	6319130	6322474	GDSL-like lipase/acylhydrolase, putative, expressed	0.041619	9.94437
94	GR	qGR1-1	LOC_Os01g11720	Chr1	6328086	6333412	transposable element protein, putative, containing Pfam profile: PF03004, Transposase_24, expressed	0.0742535	0.02529
95	GR	qGR1-1	LOC_Os01g11730	Chr1	6340836	6344345	GDSL-like lipase/acylhydrolase, putative, expressed	0.045308	0.229647
96	GR	qGR1-1	LOC_Os01g11740	Chr1	6352582	6358359	GDSL-like lipase/acylhydrolase, putative, expressed	0.080734	0.002227
97	GR	qGR1-1	LOC_Os01g11750	Chr1	6361526	6363457	GDSL-like lipase/acylhydrolase, putative, expressed	0.048436	0.849662
98	GR	qGR1-1	LOC_Os01g11760	Chr1	6365028	6367159	GDSL-like lipase/acylhydrolase, putative, expressed	0.013858	0.0117095
99	GR	qGR1-1	LOC_Os01g11770	Chr1	6368038	6368517	expressed protein	0.179518	0
100	GR	qGR1-1	LOC_Os01g11780	Chr1	6369419	6370066	expressed protein	0.068849	0.0624265
101	GR	qGR1-1	LOC_Os01g11790	Chr1	6377261	6382037	GDSL-like lipase/acylhydrolase, putative, expressed	0	0
102	GR	qGR1-1	LOC_Os01g11800	Chr1	6382881	6383687	retrotransposon protein, putative, unclassified, expressed
103	GR	qGR1-1	LOC_Os01g11810	Chr1	6387691	6391467	powdery mildew resistant protein 5, putative, expressed	0.622442	3.32147
104	GR	qGR1-1	LOC_Os01g11820	Chr1	6394268	6395667	expressed protein	0.060243	0.178136
105	GR	qGR1-1	LOC_Os01g11830	Chr1	6396150	6397294	oryzain alpha chain precursor, putative, expressed	0	0.009561
106	GR	qGR1-1	LOC_Os01g11840	Chr1	6400890	6402066	xylem cysteine proteinase 2 precursor, putative, expressed	0	0
107	GR	qGR1-1	LOC_Os01g11850	Chr1	6402993	6410872	expressed protein	0.0057235	0.0373145
108	GR	qGR1-1	LOC_Os01g11860	Chr1	6412786	6419895	DJ-1 family protein, putative, expressed	0.195486	0.823132
109	GR	qGR1-1	LOC_Os01g11870	Chr1	6425100	6428266	expressed protein	0	0
110	GR	qGR1-1	LOC_Os01g11880	Chr1	6432336	6436086	DJ-1 family protein, putative, expressed	6.69051	5.35526
111	GR	qGR1-1	LOC_Os01g11900	Chr1	6444319	6456076	hhH-GPD superfamily base excision DNA repair protein, expressed	38.073	46.4181
112	GR	qGR1-1	LOC_Os01g11910	Chr1	6462706	6465037	basic helix-loop-helix, putative, expressed	5.94765	1.20789
113	GR	qGR1-1	LOC_Os01g11920	Chr1	6471718	6485507	retrotransposon protein, putative, unclassified, expressed	0.178152	0.662084
114	GR	qGR1-1	LOC_Os01g11940	Chr1	6494516	6499769	osFTL1 FT-Like1 homologous to Flowering Locus T gene; contains Pfam profile PF01161: Phosphatidylethanolamine-binding protein, expressed	0.021608	2.80366
115	GR	qGR1-1	LOC_Os01g11946	Chr1	6500706	6507149	ABC transporter, ATP-binding protein, putative, expressed	40.1279	23.8126
116	GR	qGR1-1	LOC_Os01g11952	Chr1	6507356	6514891	histone-lysine N-methyltransferase ATX5, putative, expressed	9.12426	9.14557
117	GR	qGR1-1	LOC_Os01g11960	Chr1	6518127	6521046	histone-lysine N-methyltransferase ATX5, putative, expressed	8.4367	11.6672
118	GR	qGR1-1	LOC_Os01g11970	Chr1	6523637	6524620	expressed protein	2.25332	0.88494
119	GR	qGR1-1	LOC_Os01g11980	Chr1	6525486	6528272	SFT2, putative, expressed	4.36511	6.4052
120	GR	qGR1-1	LOC_Os01g11990	Chr1	6528797	6531845	expressed protein	0.494255	0.272159
121	GR	qGR1-1	LOC_Os01g12000	Chr1	6534609	6535837	expressed protein	1.94771	0.903521
122	GR	qGR1-1	LOC_Os01g12010	Chr1	6537654	6537896	hypothetical protein	0	0
123	GR	qGR1-1	LOC_Os01g12020	Chr1	6541005	6543076	LTPL18 - Protease inhibitor/seed storage/LTP family protein precursor, expressed	0.008107	0
124	GR	qGR1-1	LOC_Os01g12030	Chr1	6541971	6544461	endoglucanase precursor, putative, expressed	0	0.000654
125	GR	qGR1-1	LOC_Os01g12040	Chr1	6546714	6554267	transposon protein, putative, unclassified, expressed	0	0.002624
126	GR	qGR1-1	LOC_Os01g12060	Chr1	6558931	6559377	expressed protein	1.18422	0.583853
127	GR	qGR1-1	LOC_Os01g12070	Chr1	6564673	6568151	endoglucanase precursor, putative, expressed	0	0.000553
128	GR	qGR1-1	LOC_Os01g12080	Chr1	6572023	6577171	plant-specific domain TIGR01589 family protein, putative, expressed	109.979	136.831
129	GR	qGR1-1	LOC_Os01g12090	Chr1	6583822	6586889	ribosomal protein S6 family protein, putative, expressed	20.1784	17.4283
130	GR	qGR1-1	LOC_Os01g12100	Chr1	6587146	6587940	expressed protein	25.9691	23.618
131	GR	qGR1-1	LOC_Os01g12110	Chr1	6590899	6592136	expressed protein	0	0.043721
132	GR	qGR1-1	LOC_Os01g12120	Chr1	6606521	6607239	expressed protein
133	GR	qGR1-1	LOC_Os01g12130	Chr1	6612343	6613905	nodulin MtN3 family protein, putative, expressed	1.73832	3.33173
134	GR	qGR1-1	LOC_Os01g12140	Chr1	6615403	6615768	expressed protein	0.071481	0.032259
135	GR	qGR1-1	LOC_Os01g12150	Chr1	6616732	6618823	expressed protein	0	0.000772
136	SL	qSL1-1	LOC_Os01g53150	Chr1	30537135	30541871	GTPase of unknown function domain containing protein, putative, expressed	20.5316	34.3686
137	SL	qSL1-1	LOC_Os01g53160	Chr1	30542800	30544190	DUF623 domain containing protein, expressed	0.0870655	1.51517
138	SL	qSL1-1	LOC_Os01g53170	Chr1	30551624	30553990	retrotransposon protein, putative, unclassified, expressed	0.01694	0.069555
139	SL	qSL1-1	LOC_Os01g53180	Chr1	30554345	30554710	retrotransposon protein, putative, Ty1-copia subclass, expressed	0	0.253446
140	SL	qSL1-1	LOC_Os01g53190	Chr1	30555330	30557784	expressed protein	0	0.0974015
141	SL	qSL1-1	LOC_Os01g53200	Chr1	30561145	30564493	flavin monooxygenase, putative, expressed	0.041286	0.253835
142	SL	qSL1-1	LOC_Os01g53210	Chr1	30574861	30576287	metal transporter Nramp3, putative, expressed	0.799689	0.846253
143	SL	qSL1-1	LOC_Os01g53220	Chr1	30582485	30583743	HSF-type DNA-binding domain containing protein, expressed	1.1554	0.876867
144	SL	qSL1-1	LOC_Os01g53230	Chr1	30585100	30585423	expressed protein	0.001226	0.024
145	SL	qSL1-1	LOC_Os01g53240	Chr1	30589859	30592660	BURP domain containing protein, expressed	6.91647	14.6553
146	SL	qSL1-1	LOC_Os01g53250	Chr1	30593434	30598522	NADPH reductase, putative, expressed	16.8102	10.7277
147	SL	qSL1-1	LOC_Os01g53255	Chr1	30600797	30602032	expressed protein	0	0.073034
148	SL	qSL1-1	LOC_Os01g53260	Chr1	30604295	30608077	WRKY23, expressed	1.33784	0.813871
149	SL	qSL1-1	LOC_Os01g53280	Chr1	30608363	30611884	50S ribosomal protein L20, putative, expressed	4.64484	3.44651
150	SL	qSL1-1	LOC_Os01g53294	Chr1	30622671	30634405	respiratory burst oxidase protein B, putative, expressed	11.4256	18.619
151	SL	qSL1-1	LOC_Os01g53310	Chr1	30634643	30637147	hypothetical protein	0	0
152	SL	qSL1-1	LOC_Os01g53320	Chr1	30640759	30643104	transposon protein, putative, unclassified, expressed	0	0.0014585
153	SL	qSL1-1	LOC_Os01g53330	Chr1	30647512	30649347	anthocyanidin 5,3-O-glucosyltransferase, putative, expressed	5.70906	16.1583
154	SL	qSL1-1	LOC_Os01g53340	Chr1	30649919	30650248	expressed protein	0.0924325	0.028593
155	SL	qSL1-1	LOC_Os01g53350	Chr1	30655289	30657194	anthocyanidin 5,3-O-glucosyltransferase, putative, expressed	5.79482	11.4968
156	SL	qSL1-1	LOC_Os01g53360	Chr1	30657407	30657880	expressed protein	0	0
157	SL	qSL1-1	LOC_Os01g53370	Chr1	30666639	30668631	anthocyanidin 5,3-O-glucosyltransferase, putative, expressed	0.144765	0.623894
158	SL	qSL1-1	LOC_Os01g53380	Chr1	30671532	30671993	anthocyanidin 5,3-O-glucosyltransferase, putative, expressed	0.076673	0.00374
159	SL	qSL1-1	LOC_Os01g53390	Chr1	30675473	30677421	glucosyltransferase, putative, expressed	2.29939	1.02002
160	SL	qSL1-1	LOC_Os01g53420	Chr1	30689847	30691598	anthocyanidin 5,3-O-glucosyltransferase, putative, expressed	1.42077	0.913365
161	SL	qSL1-1	LOC_Os01g53430	Chr1	30694909	30696710	anthocyanidin 5,3-O-glucosyltransferase, putative, expressed	0.492563	0.292639
162	SL	qSL1-1	LOC_Os01g53440	Chr1	30708280	30708681	expressed protein
163	SL	qSL1-1	LOC_Os01g53460	Chr1	30712157	30713844	anthocyanidin 5,3-O-glucosyltransferase, putative, expressed	0.637452	0.847585
164	SL	qSL1-1	LOC_Os01g53450	Chr1	30712157	30717688	aminotransferase, classes I and II, domain containing protein, expressed	1.9182	2.62603
165	SL	qSL1-1	LOC_Os01g53470	Chr1	30718930	30719957	harpin-induced protein 1 domain containing protein, expressed	0.122229	0.281429
166	SL	qSL1-1	LOC_Os01g53480	Chr1	30720747	30723255	retrotransposon protein, putative, Ty3-gypsy subclass, expressed	0	0.0048095
167	SL	qSL1-1	LOC_Os01g53500	Chr1	30730645	30731238	RING-H2 finger protein ATL2M, putative, expressed	1.20844	3.30746
168	SL	qSL1-1	LOC_Os01g53520	Chr1	30738697	30740729	reticulon domain containing protein, putative, expressed	142.976	250.686
169	SL	qSL1-1	LOC_Os01g53540	Chr1	30747517	30747735	expressed protein	0	0
170	SL	qSL1-1	LOC_Os01g53550	Chr1	30748297	30749174	expressed protein	0	0.035783
171	SL	qSL1-1	LOC_Os01g53560	Chr1	30753219	30761219	phosphoesterase, putative, expressed	3.276	4.44686
172	SL	qSL1-1	LOC_Os01g53570	Chr1	30764089	30766588	aluminum-activated malate transporter, putative, expressed	0.0297475	0.0369445
173	SL	qSL1-1	LOC_Os01g53580	Chr1	30768475	30769101	3-5 exonuclease domain-containing protein, putative, expressed	0.022808	0.020648
174	SL	qSL1-1	LOC_Os01g53590	Chr1	30770399	30773003	3-5 exonuclease domain-containing protein, putative, expressed	0	0
175	SL	qSL1-1	LOC_Os01g53600	Chr1	30775102	30779273	farnesyltransferase subunit beta, putative, expressed	18.7104	19.0573
176	SL	qSL1-1	LOC_Os01g53610	Chr1	30779393	30782727	selenium-binding protein, related, putative, expressed	5.74941	5.16078
177	SL	qSL1-1	LOC_Os01g53620	Chr1	30786103	30788024	expressed protein	8.5398	15.2794
178	SL	qSL1-1	LOC_Os01g53630	Chr1	30788730	30796556	ulp1 protease family protein, putative, expressed	0.265342	1.37238
179	SL	qSL1-1	LOC_Os01g53640	Chr1	30818942	30823247	retrotransposon protein, putative, unclassified, expressed	0.152668	8.23141
180	SL	qSL1-1	LOC_Os01g53650	Chr1	30824689	30825670	zinc finger CCCH type family protein, putative, expressed	0.017597	0
181	SL	qSL1-1	LOC_Os01g53660	Chr1	30828771	30832258	transposon protein, putative, unclassified, expressed	5.16284	3.94315
182	SL	qSL1-1	LOC_Os01g53670	Chr1	30832796	30836734	ENTH domain containing protein, expressed	14.2279	6.18445
183	SL	qSL1-1	LOC_Os01g53680	Chr1	30840129	30845230	6-phosphofructokinase, putative, expressed	5.59101	18.3029
184	SL	qSL1-1	LOC_Os01g53690	Chr1	30846917	30847494	expressed protein	0	0
185	SL	qSL1-1	LOC_Os01g53700	Chr1	30850589	30856227	mitochondrial-processing peptidase subunit, mitochondrial precursor, putative, expressed	28.299	52.2843
186	SL	qSL1-1	LOC_Os01g53710	Chr1	30868407	30871603	dual specificity protein phosphatase, putative, expressed	14.6424	14.6781
187	SL	qSL1-1	LOC_Os01g53720	Chr1	30879000	30886338	expressed protein	38.9981	14.6098
188	SL	qSL1-1	LOC_Os01g53730	Chr1	30884821	30886340	expressed protein	78.7455	7.05164
189	SL	qSL1-1	LOC_Os01g53740	Chr1	30889799	30890656	hypothetical protein	0	0
190	SL	qSL1-1	LOC_Os01g53750	Chr1	30897973	30900620	glucan endo-1,3-beta-glucosidase precursor, putative, expressed	0.569984	3.21539
191	SL	qSL1-1	LOC_Os01g53760	Chr1	30902744	30903058	expressed protein	0	0.0920185
192	SL	qSL1-1	LOC_Os01g53770	Chr1	30905585	30906259	expressed protein	0	0.0194735
193	SL	qSL1-1	LOC_Os01g53779	Chr1	30909430	30916476	expressed protein	2.02181	1.05203
194	SL	qSL1-1	LOC_Os01g53790	Chr1	30918104	30921341	stress-induced protein, putative, expressed	0.642851	0.705402
195	SL	qSL1-1	LOC_Os01g53800	Chr1	30922769	30927426	glutamate carboxypeptidase 2, putative, expressed	4.16776	5.3158
196	SL	qSL1-2	LOC_Os01g54420	Chr1	31308244	31312914	dynamin family protein, putative, expressed	0.679747	2.41579
197	SL	qSL1-2	LOC_Os01g54424	Chr1	31313396	31317560	expressed protein	1.98883	2.50838
198	SL	qSL1-2	LOC_Os01g54430	Chr1	31318040	31319158	plastocyanin-like domain containing protein, putative, expressed	0	0
199	SL	qSL1-2	LOC_Os01g54440	Chr1	31320163	31321848	expressed protein	2.1721	2.07944
200	SL	qSL1-2	LOC_Os01g54450	Chr1	31324472	31325017	DUF584 domain containing protein, putative, expressed	0.079905	0
201	SL	qSL1-2	LOC_Os01g54460	Chr1	31327322	31328257	expressed protein	0	0.049346
202	SL	qSL1-2	LOC_Os01g54470	Chr1	31331308	31333613	GDSL-like lipase/acylhydrolase, putative, expressed	3.66801	2.53016
203	SL	qSL1-2	LOC_Os01g54480	Chr1	31332864	31337161	serine/threonine protein kinase, putative, expressed	19.0469	22.3583
204	SL	qSL1-2	LOC_Os01g54490	Chr1	31343364	31345522	osFTL9 FT-Like9 homologous to Flowering Locus T gene; contains Pfam profile PF01161: Phosphatidylethanolamine-binding protein	0	0.363996
205	SL	qSL1-2	LOC_Os01g54510	Chr1	31349612	31353161	MAC/Perforin domain containing protein, putative, expressed	15.9891	9.95303
206	SL	qSL1-2	LOC_Os01g54515	Chr1	31356182	31358948	peptide transporter PTR2, putative, expressed	0.043205	0.0003055
207	SL	qSL1-2	LOC_Os01g54520	Chr1	31359199	31362009	DUF1264 domain containing protein, putative, expressed	0.0064015	0
208	SL	qSL1-2	LOC_Os01g54530	Chr1	31362634	31365594	hydrolase, acting on carbon-nitrogen, putative, expressed	5.31448	6.38519
209	SL	qSL1-2	LOC_Os01g54540	Chr1	31367015	31369416	ribosomal protein L13, putative, expressed	57.9104	363.173
210	SL	qSL1-2	LOC_Os01g54550	Chr1	31370225	31372759	HSF-type DNA-binding domain containing protein, expressed	7.87955	7.60797
211	SL	qSL1-2	LOC_Os01g54560	Chr1	31373407	31377545	trehalose synthase, putative, expressed	27.8559	11.4385
212	SL	qSL1-2	LOC_Os01g54570	Chr1	31391261	31392235	DUF623 domain containing protein, expressed	0	0.142285
213	SL	qSL1-2	LOC_Os01g54580	Chr1	31394832	31400091	transporter family protein, putative, expressed	10.8336	8.00269
214	SL	qSL1-2	LOC_Os01g54590	Chr1	31403786	31407261	ras-related protein, putative, expressed	2.62713	19.3365
215	SL	qSL1-2	LOC_Os01g54600	Chr1	31409004	31410978	WRKY13, expressed	22.0816	2.90835
216	SL	qSL1-2	LOC_Os01g54610	Chr1	31419937	31421528	retrotransposon protein, putative, unclassified	0	0
217	SL	qSL1-2	LOC_Os01g54620	Chr1	31422946	31428688	CESA4 - cellulose synthase, expressed	2.10063	110.805
218	SL	qSL1-2	LOC_Os01g54630	Chr1	31431623	31433202	leucine rich repeat family protein, putative, expressed	0	0.0535715
219	SL	qSL1-2	LOC_Os01g54640	Chr1	31434269	31436091	retrotransposon protein, putative, unclassified	0	0
220	SL	qSL1-2	LOC_Os01g54650	Chr1	31440372	31443627	retrotransposon protein, putative, unclassified, expressed	0.003127	0.002338
221	SL	qSL1-2	LOC_Os01g54660	Chr1	31444256	31450372	retrotransposon protein, putative, unclassified, expressed	0.0035215	0.001757
222	SL	qSL1-2	LOC_Os01g54670	Chr1	31453332	31457551	coiled-coil domain-containing protein 25, putative, expressed	1.30997	3.11636
223	SL	qSL1-2	LOC_Os01g54680	Chr1	31462022	31465247	retrotransposon protein, putative, unclassified, expressed	0	0.000311
224	SL	qSL1-2	LOC_Os01g54690	Chr1	31466316	31471363	retrotransposon protein, putative, unclassified, expressed	0.003518	0.000438
225	SL	qSL1-2	LOC_Os01g54700	Chr1	31473897	31477599	retrotransposon protein, putative, unclassified, expressed	1.26721	1.02591
226	SL	qSL1-2	LOC_Os01g54714	Chr1	31480770	31486725	retrotransposon protein, putative, unclassified, expressed	0.0106445	0
227	SL	qSL1-2	LOC_Os01g54730	Chr1	31487114	31490247	expressed protein	9.8203	20.3815
228	SL	qSL1-2	LOC_Os01g54740	Chr1	31497674	31498418	transposon protein, putative, unclassified, expressed	0.971889	1.35368
229	SL	qSL1-2	LOC_Os01g54750	Chr1	31502527	31502973	expressed protein	0.46579	0.178934
230	SL	qSL1-2	LOC_Os01g54760	Chr1	31503981	31506206	hypothetical protein	0	0
231	SL	qSL1-2	LOC_Os01g54770	Chr1	31508642	31510037	expressed protein	0	0.004739
232	SL	qSL1-2	LOC_Os01g54784	Chr1	31511534	31519595	expressed protein	13.3493	15.9152
233	SL	qSL1-2	LOC_Os01g54800	Chr1	31521222	31521674	expressed protein	0.01205	0.0277525
234	SL	qSL1-2	LOC_Os01g54810	Chr1	31524048	31527177	lipase, putative, expressed	1.34954	2.03712
235	SL	qSL1-2	LOC_Os01g54820	Chr1	31529765	31532987	retrotransposon protein, putative, Ty3-gypsy subclass, expressed	0.0037965	0.0241545
236	SL	qSL1-2	LOC_Os01g54830	Chr1	31533340	31540054	retrotransposon protein, putative, Ty3-gypsy subclass, expressed	0.001191	0
237	SL	qSL1-2	LOC_Os01g54850	Chr1	31550655	31553052	OsFBX24 - F-box domain containing protein, expressed	8.58769	9.65529
238	SL	qSL1-2	LOC_Os01g54860	Chr1	31552457	31556837	enoyl-CoA hydratase/isomerase family protein, putative, expressed	23.9978	34.3965
239	SL	qSL1-2	LOC_Os01g54870	Chr1	31559209	31560836	60S ribosomal protein L18a, putative, expressed	89.4556	92.4276
240	SL	qSL1-2	LOC_Os01g54880	Chr1	31561385	31564166	glucosidase 2 subunit beta precursor, putative, expressed	13.3958	15.8918
241	SL	qSL1-2	LOC_Os01g54890	Chr1	31567891	31568741	ethylene-responsive transcription factor 2, putative, expressed	6.4532	4.9167
242	SL	qSL1-2	LOC_Os01g54900	Chr1	31568908	31575611	lipid-A-disaccharide synthase family protein, expressed	3.74959	3.64922
243	SL	qSL1-2	LOC_Os01g54910	Chr1	31575708	31583605	GTP-binding protein typA/bipA, putative, expressed	33.9383	25.102
244	SL	qSL1-2	LOC_Os01g54920	Chr1	31585098	31589135	heat- and acid-stable phosphoprotein, putative, expressed	93.2441	197.433
245	SL	qSL1-2	LOC_Os01g54930	Chr1	31592123	31597382	one zinc finger protein, putative, expressed	17.3517	7.395
246	SL	qSL1-2	LOC_Os01g54940	Chr1	31599157	31604594	dehydrogenase, putative, expressed	25.4166	47.5705
247	SL	qSL1-2	LOC_Os01g54950	Chr1	31605287	31607662	expressed protein	0.432791	0.387225
248	SL	qSL1-2	LOC_Os01g54960	Chr1	31608076	31609714	expressed protein	18.6175	8.28352
249	SL	qSL1-2	LOC_Os01g54969	Chr1	31610738	31612133	O-methyltransferase, putative, expressed	0	0
250	SL	qSL1-2	LOC_Os01g54980	Chr1	31612795	31614644	expressed protein	0.037961	0.00832
251	SL	qSL1-2	LOC_Os01g54990	Chr1	31617167	31623205	auxin response factor, putative, expressed	5.34235	18.4597
252	SL	qSL1-2	LOC_Os01g55000	Chr1	31629246	31630738	expressed protein	0.0407465	16.5435
253	SL	qSL1-2	LOC_Os01g55010	Chr1	31634046	31635118	EBNA-1, putative, expressed	0	0.0025
254	SL	qSL1-2	LOC_Os01g55020	Chr1	31635565	31638430	expressed protein	3.29087	7.99748
255	SL	qSL1-2	LOC_Os01g55030	Chr1	31638589	31640485	DNA-binding protein-related, putative, expressed	13.3153	8.76647
256	SL	qSL1-2	LOC_Os01g55040	Chr1	31641231	31648756	1,3-beta-glucan synthase component, putative, expressed	11.7021	6.35373
257	SL	qSL1-2	LOC_Os01g55050	Chr1	31651616	31656531	protein of unknown function DUF1421 domain containing protein, expressed	22.0727	12.0911
258	SL	qSL1-2	LOC_Os01g55060	Chr1	31659521	31659790	expressed protein	0	0
259	SL	qSL1-2	LOC_Os01g55070	Chr1	31661724	31664293	pentatricopeptide, putative, expressed	0.394899	0.627482
260	SL	qSL1-2	LOC_Os01g55080	Chr1	31669728	31670015	expressed protein	0	0.085617
261	SL	qSL1-2	LOC_Os01g55090	Chr1	31672195	31676356	transposon protein, putative, Mutator sub-class, expressed	11.2316	11.4965
262	SL	qSL1-2	LOC_Os01g55094	Chr1	31678311	31689927	expressed protein	11.9822	8.3435
263	SL	qSL1-2	LOC_Os01g55100	Chr1	31699450	31701494	slTCP3, putative, expressed	0.59027	2.33643
264	SL	qSL1-2	LOC_Os01g55110	Chr1	31710636	31711950	RING-H2 finger protein, putative, expressed	5.3809	1.29364
265	SL	qSL1-2	LOC_Os01g55120	Chr1	31718042	31719808	expressed protein	0.023637	0.004072
266	SL	qSL1-2	LOC_Os01g55130	Chr1	31722218	31722559	expressed protein
267	SL	qSL1-2	LOC_Os01g55140	Chr1	31724277	31725243	expressed protein	0.045461	0.028519
268	SL	qSL1-2	LOC_Os01g55150	Chr1	31728015	31730389	bZIP transcription factor domain containing protein, expressed	0.194912	6.67128
269	SL	qSL1-2	LOC_Os01g55160	Chr1	31731974	31732949	expressed protein	0.779292	1.08448
270	SL	qSL1-2	LOC_Os01g55170	Chr1	31738055	31742794	la domain containing protein, expressed	37.0808	29.127
271	SL	qSL1-2	LOC_Os01g55180	Chr1	31743861	31748581	expressed protein	0	0.017786
272	SL	qSL1-2	LOC_Os01g55190	Chr1	31749149	31753374	expressed protein	0.57476	15.3714
273	SL	qSL1-2	LOC_Os01g55200	Chr1	31761223	31763887	potassium channel KAT1, putative, expressed	0	0.146656
274	SL	qSL1-2	LOC_Os01g55210	Chr1	31764561	31765103	OsFBX25 - F-box domain containing protein, expressed	0	0.022122
275	SL	qSL1-2	LOC_Os01g55220	Chr1	31766630	31766842	expressed protein	0.081721	10.5427
276	SL	qSL1-2	LOC_Os01g55240	Chr1	31795105	31797643	gibberellin 2-beta-dioxygenase, putative, expressed	13.0787	2.87083
277	SL	qSL1-2	LOC_Os01g55250	Chr1	31799902	31800714	expressed protein	0	0.042187
278	SL	qSL1-2	LOC_Os01g55260	Chr1	31806962	31811865	AAA-type ATPase family protein, putative, expressed	3.30825	3.33915
279	SL	qSL1-2	LOC_Os01g55270	Chr1	31811345	31814593	SGS domain containing protein, expressed	21.3546	22.9072
280	SL	qSL1-2	LOC_Os01g55280	Chr1	31815517	31816881	expressed protein	0.678061	3.92946
281	SL	qSL1-2	LOC_Os01g55290	Chr1	31825966	31830182	PPR repeat domain containing protein, putative, expressed	13.1778	33.6587
282	SL	qSL1-2	LOC_Os01g55300	Chr1	31830297	31836984	DNA-directed polymerase, putative, expressed	7.69343	6.57371
283	SL	qSL1-2	LOC_Os01g55310	Chr1	31836495	31839636	haloacid dehalogenase-like hydrolase domain-containing protein 1A, putative, expressed	3.32285	3.9459
284	SL	qSL1-2	LOC_Os01g55320	Chr1	31840530	31841097	heavy metal-associated domain containing protein, expressed	0.009898	0.067775
285	SL	qSL1-2	LOC_Os01g55330	Chr1	31846389	31846784	embryonic protein DC-8, putative, expressed	0.172694	0.141066
286	SL	qSL1-2	LOC_Os01g55340	Chr1	31850537	31851619	dof zinc finger domain containing protein, putative, expressed	3.31617	0.477133
287	SL	qSL1-2	LOC_Os01g55350	Chr1	31859331	31865031	phosphoenolpyruvate carboxylase, putative, expressed	0.058357	0.642735
288	SL	qSL1-2	LOC_Os01g55360	Chr1	31870932	31877607	phosphatidate cytidylyltransferase, putative, expressed	29.4715	23.7321
289	SL	qSL1-2	LOC_Os01g55370	Chr1	31889711	31891433	expressed protein	0.401128	0.421869
290	SL	qSL1-2	LOC_Os01g55380	Chr1	31892182	31892615	hypothetical protein	0	0
291	SL	qSL1-2	LOC_Os01g55390	Chr1	31909559	31911650	retrotransposon protein, putative, unclassified, expressed	5.35245	11.9236
292	SL	qSL1-2	LOC_Os01g55400	Chr1	31916597	31918264	expressed protein	0.009689	0.0894795
293	SL	qSL1-2	LOC_Os01g55410	Chr1	31919494	31922406	expressed protein	3.95672	7.007
294	SL	qSL1-2	LOC_Os01g55420	Chr1	31925866	31927051	expressed protein	0.216723	0.878903
295	SL	qSL1-2	LOC_Os01g55430	Chr1	31927134	31930005	OsFBT2 - F-box and tubby domain containing protein, expressed	0.0014905	0.117351
296	SL	qSL1-2	LOC_Os01g55440	Chr1	31938442	31940188	CAMK_KIN1/SNF1/Nim1_like.1 - CAMK includes calcium/calmodulin depedent protein kinases, expressed	0.026425	0.026862
297	SL	qSL1-2	LOC_Os01g55450	Chr1	31943528	31948580	CAMK_KIN1/SNF1/Nim1_like.11 - CAMK includes calcium/calmodulin depedent protein kinases, expressed	3.78897	6.30658
298	SL	qSL1-2	LOC_Os01g55470	Chr1	31957499	31961019	transposon protein, putative, CACTA, En/Spm sub-class, expressed	0	0
299	SL	qSL1-2	LOC_Os01g55480	Chr1	31962624	31965777	transposon protein, putative, CACTA, En/Spm sub-class, expressed	0.004738	0.0004635
300	SL	qSL1-2	LOC_Os01g55490	Chr1	31969293	31974175	transcriptional regulator family protein, putative, expressed	20.8317	18.4674
301	SL	qSL1-2	LOC_Os01g55500	Chr1	31975992	31980079	nucleobase-ascorbate transporter, putative, expressed	0.483615	4.68212
302	SL	qSL1-2	LOC_Os01g55510	Chr1	31981931	31982832	dynein light chain type 1 domain containing protein, expressed	2.335	8.00696
303	SL	qSL1-2	LOC_Os01g55520	Chr1	31986499	31989237	ATROPGEF7/ROPGEF7, putative, expressed	0.014163	0.0350095
304	SL	qSL1-2	LOC_Os01g55530	Chr1	31992087	31996466	AP003256-AK101847 - NBS/LRR genes that are S-rich,divergent TIR, divergent NBS, expressed	1.63804	1.81635
305	SL	qSL1-2	LOC_Os01g55540	Chr1	31998651	32003690	aminotransferase, classes I and II, domain containing protein, expressed	55.7769	35.0475
306	SL	qSL1-2	LOC_Os01g55549	Chr1	32006374	32009784	homeobox and START domains containing protein, putative, expressed	0.027845	0.027988
307	SL	qSL1-2	LOC_Os01g55560	Chr1	32010477	32013420	ABIL3, putative, expressed	0.208658	2.2196
308	SL	qSL1-2	LOC_Os01g55570	Chr1	32014398	32016278	expressed protein	92.222	253.737
309	SL	qSL1-2	LOC_Os01g55580	Chr1	32016622	32022401	tesmin/TSO1-like CXC domain containing protein, expressed	9.60459	3.60994
310	SL	qSL1-2	LOC_Os01g55590	Chr1	32026305	32032687	AMP-binding enzyme, putative, expressed	26.787	25.9613
311	SL	qSL1-2	LOC_Os01g55600	Chr1	32032686	32035011	peptide transporter PTR2, putative, expressed	0.0513895	0.181573
312	SL	qSL1-2	LOC_Os01g55610	Chr1	32038018	32040378	peptide transporter PTR2, putative, expressed	0.0963735	0.484252
313	SL	qSL1-2	LOC_Os01g55620	Chr1	32049962	32050766	transposon protein, putative, unclassified, expressed	0	0.0565655
314	SL	qSL1-2	LOC_Os01g55630	Chr1	32052966	32054348	glutelin, putative, expressed	0	0.0015335
315	SL	qSL1-2	LOC_Os01g55640	Chr1	32057155	32058133	seven in absentia protein family protein, putative, expressed	0.045289	0.008106
316	SL	qSL1-2	LOC_Os01g55650	Chr1	32057383	32062829	phospholipase, patatin family, putative, expressed	8.13746	2.42248
317	SL	qSL1-2	LOC_Os01g55660	Chr1	32065489	32069846	retrotransposon protein, putative, Ty1-copia subclass, expressed	0.519525	0.918689
318	SL	qSL1-2	LOC_Os01g55670	Chr1	32070785	32072083	expressed protein	36.093	33.9968
319	SL	qSL1-2	LOC_Os01g55700	Chr1	32072449	32082488	NLI interacting factor-like phosphatase, putative, expressed	5.42148	10.867
320	SL	qSL1-2	LOC_Os01g55690	Chr1	32076732	32078743	glutelin, putative, expressed	0.469341	1.55847
321	SL	qSL1-2	LOC_Os01g55710	Chr1	32083016	32083693	DNA-binding protein, putative, expressed
322	SL	qSL1-2	LOC_Os01g55720	Chr1	32088256	32089049	expressed protein	0.816803	0.841272
323	SL	qSL1-2	LOC_Os01g55730	Chr1	32091564	32094141	AGAP003732-PA, putative, expressed	17.2374	14.8002
324	SL	qSL1-2	LOC_Os01g55740	Chr1	32094403	32098715	OsRhmbd4 - Putative Rhomboid homologue, expressed	3.81207	3.96965
325	SL	qSL1-2	LOC_Os01g55750	Chr1	32106832	32109745	TCP family transcription factor, putative, expressed	7.45981	8.06634
326	SL	qSL1-2	LOC_Os01g55770	Chr1	32123247	32128053	expressed protein	32.2537	32.6839
327	SL	qSL1-2	LOC_Os01g55790	Chr1	32130255	32130647	expressed protein	0	0.005396
328	SL	qSL1-2	LOC_Os01g55780	Chr1	32130586	32137004	glycerophosphoryl diester phosphodiesterase family protein, putative, expressed	24.9777	40.6058
329	SL	qSL1-2	LOC_Os01g55799	Chr1	32137366	32143435	exo70 exocyst complex subunit domain containing protein, expressed	5.77819	7.82308
330	SL	qSL1-2	LOC_Os01g55795	Chr1	32143762	32145285	expressed protein	0	0
331	SL	qSL1-2	LOC_Os01g55820	Chr1	32145824	32147365	X8 domain containing protein, expressed	0.297495	0.812194
332	SL	qSL1-2	LOC_Os01g55830	Chr1	32148052	32152116	glutathione S-transferase, putative, expressed	90.4294	261.705
333	SL	qSL1-2	LOC_Os01g55840	Chr1	32154275	32156153	retrotransposon protein, putative, unclassified, expressed	0.0365045	0
334	SL	qSL1-2	LOC_Os01g55850	Chr1	32165440	32165796	expressed protein	0	0.000374
335	SL	qSL1-2	LOC_Os01g55860	Chr1	32167881	32171343	expressed protein	4.19839	3.48001
336	SL	qSL1-2	LOC_Os01g55870	Chr1	32171722	32175018	chorismate mutase, chloroplast precursor, putative, expressed	25.5625	36.0424
337	SL	qSL1-2	LOC_Os01g55880	Chr1	32177890	32181792	hemimethylated DNA binding domain containing protein, expressed	11.7692	17.7759
338	SL	qSL1-2	LOC_Os01g55890	Chr1	32185406	32189756	amino acid kinase, putative, expressed	21.9574	21.6717
339	SL	qSL1-2	LOC_Os01g55900	Chr1	32189931	32193462	holliday junction resolvase, putative, expressed	3.11934	3.85127
340	SL	qSL1-2	LOC_Os01g55910	Chr1	32206224	32211250	retrotransposon protein, putative, unclassified, expressed	0	0
341	SL	qSL1-2	LOC_Os01g55920	Chr1	32211573	32214918	retrotransposon protein, putative, unclassified, expressed	0	0
342	SL	qSL1-2	LOC_Os01g55930	Chr1	32216045	32216368	retrotransposon protein, putative, Ty3-gypsy subclass
343	SL	qSL1-2	LOC_Os01g55940	Chr1	32221376	32225123	OsGH3.2 - Probable indole-3-acetic acid-amido synthetase, expressed	2.16223	2.59918
344	SL	qSL1-2	LOC_Os01g55950	Chr1	32226885	32229632	acetamidase, putative, expressed	21.7904	67.7896
345	SL	qSL1-2	LOC_Os01g55960	Chr1	32231125	32232573	pentatricopeptide, putative, expressed	0.623667	1.20148
346	SL	qSL1-2	LOC_Os01g55974	Chr1	32233035	32238980	deoxycytidylate deaminase, putative, expressed	1.96656	3.22048
347	SL	qSL1-2	LOC_Os01g55990	Chr1	32240137	32240724	expressed protein	0	0
348	SL	qSL1-2	LOC_Os01g56000	Chr1	32241235	32250788	RNA recognition motif containing protein, expressed	11.1871	8.9159
349	SL	qSL1-2	LOC_Os01g56010	Chr1	32249971	32251625	serpin domain containing protein, putative, expressed	0.649606	0.39906
350	SL	qSL1-2	LOC_Os01g56020	Chr1	32252117	32255022	expressed protein	0.049234	1.40722
351	SL	qSL1-2	LOC_Os01g56030	Chr1	32258914	32260026	EF hand family protein, putative, expressed	0.08485	0.1131
352	SL	qSL1-2	LOC_Os01g56040	Chr1	32267055	32269458	zinc finger A20 and AN1 domain-containing stress-associated protein, putative, expressed	0	0
353	SL	qSL1-2	LOC_Os01g56050	Chr1	32270054	32272147	MATE efflux family protein, putative, expressed	0.042729	0.0331175
354	SL	qSL1-2	LOC_Os01g56060	Chr1	32273018	32273482	hypothetical protein	0.107442	0.0301765
355	SL	qSL1-2	LOC_Os01g56070	Chr1	32276550	32278226	RING finger protein, putative, expressed	8.52263	15.741
356	SL	qSL1-2	LOC_Os01g56080	Chr1	32289147	32289804	expressed protein	0.345739	0.0191805
357	SL	qSL1-2	LOC_Os01g56090	Chr1	32293824	32295257	expressed protein	0.347297	1.02655
358	SL	qSL1-2	LOC_Os01g56100	Chr1	32298855	32303035	BSD domain containing protein, expressed	10.8725	13.153
359	SL	qSL1-2	LOC_Os01g56110	Chr1	32303699	32306637	RNA recognition motif containing protein, putative, expressed	0	0
360	SL	qSL1-2	LOC_Os01g56120	Chr1	32308807	32313194	RNA recognition motif containing protein, putative, expressed	0	0
361	SL	qSL1-2	LOC_Os01g56130	Chr1	32318613	32322673	CSLC1 - cellulose synthase-like family C, expressed	4.44313	9.46531
362	SL	qSL1-2	LOC_Os01g56140	Chr1	32327698	32332777	expressed protein	42.3318	45.5779
363	SL	qSL1-2	LOC_Os01g56150	Chr1	32334652	32338090	OsProCP1 - Putative Lysosomal Pro-x Carboxypeptidase homologue, expressed	10.0189	12.4131
364	SL	qSL1-2	LOC_Os01g56160	Chr1	32338330	32339088	expressed protein	0.0900745	0.0198095
365	FW	qFW1-1	LOC_Os01g23800	Chr1	13389999	13392236	expressed protein	0	0.050564
366	FW	qFW1-1	LOC_Os01g23810	Chr1	13396264	13397109	expressed protein	0.009108	0.032383
367	FW	qFW1-1	LOC_Os01g23820	Chr1	13401924	13402382	retrotransposon protein, putative, Ty3-gypsy subclass, expressed	0	0
368	FW	qFW1-1	LOC_Os01g23830	Chr1	13410760	13412091	retrotransposon protein, putative, unclassified, expressed	0	0
369	FW	qFW1-1	LOC_Os01g23840	Chr1	13414418	13415232	transposon protein, putative, unclassified, expressed	0.068076	0.137546
370	FW	qFW1-1	LOC_Os01g23850	Chr1	13422753	13424642	transposon protein, putative, CACTA, En/Spm sub-class, expressed	0.340121	1.11558
371	FW	qFW1-1	LOC_Os01g23870	Chr1	13436891	13438586	expressed protein	0.638574	1.7123
372	FW	qFW1-1	LOC_Os01g23880	Chr1	13442496	13443696	expressed protein	0.064386	0.171485
373	FW	qFW1-1	LOC_Os01g23890	Chr1	13444016	13445074	expressed protein	0	0
374	FW	qFW1-1	LOC_Os01g23900	Chr1	13447908	13452476	retrotransposon protein, putative, unclassified, expressed	0	0.0231975
375	FW	qFW1-1	LOC_Os01g23910	Chr1	13454908	13455887	expressed protein	12.6175	8.60959
376	FW	qFW1-1	LOC_Os01g23920	Chr1	13459579	13460593	expressed protein
377	FW	qFW1-1	LOC_Os01g23930	Chr1	13461444	13467479	transposon protein, putative, unclassified, expressed	0.0052285	0.007395
378	FW	qFW1-1	LOC_Os01g23940	Chr1	13467990	13469759	expressed protein	0	0
379	FW	qFW1-1	LOC_Os01g23960	Chr1	13475815	13482656	retrotransposon protein, putative, Ty3-gypsy subclass, expressed	0	0.0013955
380	FW	qFW1-1	LOC_Os01g23970	Chr1	13487905	13490291	cysteine-rich receptor protein kinase, putative, expressed	0.124099	0.123649
381	FW	qFW1-1	LOC_Os01g23980	Chr1	13496278	13502236	retrotransposon protein, putative, Ty3-gypsy subclass, expressed	0.0193335	0.03628
382	FW	qFW1-1	LOC_Os01g23990	Chr1	13508317	13508882	expressed protein	3.10491	4.76285
383	FW	qFW1-1	LOC_Os01g24010	Chr1	13517518	13528480	pleiotropic drug resistance protein, putative, expressed	0.54298	0.55632
384	FW	qFW1-1	LOC_Os01g24020	Chr1	13523472	13531777	expressed protein	1.50488	0.849472
385	FW	qFW1-1	LOC_Os01g24030	Chr1	13539762	13541958	AMP-binding enzyme, putative, expressed	0.049197	0.093886
386	FW	qFW1-1	LOC_Os01g24040	Chr1	13543439	13548779	retrotransposon protein, putative, Ty1-copia subclass, expressed	0	0
387	FW	qFW1-1	LOC_Os01g24050	Chr1	13550372	13556984	expressed protein	0.001572	0.001924
388	FW	qFW1-1	LOC_Os01g24060	Chr1	13560832	13566873	importin subunit alpha, putative, expressed	7.81651	10.6592
389	FW	qFW1-1	LOC_Os01g24070	Chr1	13570607	13573322	GATA zinc finger domain containing protein, expressed	12.5309	14.4108
390	FW	qFW1-1	LOC_Os01g24080	Chr1	13577951	13581209	expressed protein	0.020919	0.015526
391	FW	qFW1-1	LOC_Os01g24090	Chr1	13582036	13584917	TPR repeat, putative, expressed	3.50763	7.41657
392	FW	qFW1-1	LOC_Os01g24100	Chr1	13591221	13593395	transposon protein, putative, unclassified, expressed	0.00548	0.017982
393	FW	qFW1-1	LOC_Os01g24110	Chr1	13594901	13595386	expressed protein	0.121353	0.138604
394	FW	qFW1-1	LOC_Os01g24120	Chr1	13595762	13598586	hypothetical protein	0.077122	0.550827
395	FW	qFW1-1	LOC_Os01g24130	Chr1	13601556	13604431	transposon protein, putative, CACTA, En/Spm sub-class, expressed	0	0.007134
396	FW	qFW1-1	LOC_Os01g24140	Chr1	13612430	13615028	transposon protein, putative, CACTA, En/Spm sub-class, expressed	0.023209	0.051065
397	FW	qFW1-1	LOC_Os01g24150	Chr1	13617508	13618144	hypothetical protein	0.0124595	0.094899
398	FW	qFW1-1	LOC_Os01g24160	Chr1	13621337	13621703	hypothetical protein	0.0430735	0.073759
399	FW	qFW1-1	LOC_Os01g24170	Chr1	13624372	13624767	hypothetical protein	0.073907	0.142826
400	FW	qFW1-1	LOC_Os01g24180	Chr1	13626406	13630428	retrotransposon protein, putative, unclassified	0.0160305	0.0737995
401	FW	qFW1-1	LOC_Os01g24190	Chr1	13630851	13632922	retrotransposon protein, putative, unclassified	0	0.034073
402	FW	qFW1-1	LOC_Os01g24200	Chr1	13635250	13637218	expressed protein	0.0304005	0.130657
403	FW	qFW1-1	LOC_Os01g24210	Chr1	13643985	13646640	retrotransposon protein, putative, Ty1-copia subclass, expressed	0.261584	0.194487
404	FW	qFW1-1	LOC_Os01g24220	Chr1	13648116	13650479	retrotransposon protein, putative, Ty1-copia subclass	0.006704	0.004486
405	FW	qFW1-1	LOC_Os01g24230	Chr1	13655806	13657189	retrotransposon, putative, centromere-specific	0.173977	0.173977
406	FW	qFW1-1	LOC_Os01g24240	Chr1	13662002	13664774	expressed protein	0.091074	0.091074
407	FW	qFW1-1	LOC_Os01g24260	Chr1	13667094	13670933	retrotransposon protein, putative, Ty1-copia subclass, expressed	0.015539	0.020742
408	FW	qFW1-1	LOC_Os01g24270	Chr1	13672136	13672612	hypothetical protein	0.085145	0.085145
409	FW	qFW1-1	LOC_Os01g24280	Chr1	13678379	13679061	retrotransposon protein, putative, unclassified, expressed	0.0105	0.0105
410	FW	qFW1-1	LOC_Os01g24294	Chr1	13684382	13694297	retrotransposon protein, putative, Ty3-gypsy subclass, expressed	0.0010135	0.25474
411	FW	qFW1-1	LOC_Os01g24310	Chr1	13698208	13701495	transposon protein, putative, CACTA, En/Spm sub-class, expressed	0	0
412	FW	qFW1-1	LOC_Os01g24320	Chr1	13703925	13704368	retrotransposon protein, putative, unclassified, expressed	0	0
413	FW	qFW1-1	LOC_Os01g24330	Chr1	13705077	13707835	retrotransposon protein, putative, unclassified, expressed	0	0
414	FW	qFW1-1	LOC_Os01g24340	Chr1	13713177	13714834	expressed protein	0.0757325	0.402802
415	FW	qFW1-1	LOC_Os01g24350	Chr1	13717346	13719543	expressed protein	0	0.002056
416	FW	qFW1-1	LOC_Os01g24360	Chr1	13726762	13732218	retrotransposon protein, putative, unclassified	0	0
417	FW	qFW1-1	LOC_Os01g24370	Chr1	13740304	13741112	retrotransposon protein, putative, unclassified	0	0
418	FW	qFW1-1	LOC_Os01g24380	Chr1	13742302	13743573	retrotransposon protein, putative, unclassified, expressed	0	0
419	FW	qFW1-1	LOC_Os01g24390	Chr1	13747340	13748637	retrotransposon protein, putative, unclassified, expressed	0	0.01351
420	FW	qFW1-1	LOC_Os01g24400	Chr1	13753503	13758477	retrotransposon protein, putative, unclassified, expressed	0	0
421	FW	qFW1-1	LOC_Os01g24410	Chr1	13761856	13763160	transposon protein, putative, CACTA, En/Spm sub-class, expressed	0	0
422	FW	qFW1-1	LOC_Os01g24420	Chr1	13765231	13772186	expressed protein	1.03324	2.21733
423	FW	qFW1-1	LOC_Os01g24430	Chr1	13775186	13776654	expressed protein	0.767533	0.88072
424	FW	qFW4-1	LOC_Os04g33500	Chr4	20260053	20261564	protein kinase, putative, expressed	4.38052	9.36273
425	FW	qFW4-1	LOC_Os04g33510	Chr4	20276155	20279496	expressed protein	4.21859	3.73125
426	FW	qFW4-1	LOC_Os04g33520	Chr4	20280360	20281977	RCLEA6 - Root cap and Late embryogenesis related family protein precursor, expressed	0.230512	0.258514
427	FW	qFW4-1	LOC_Os04g33530	Chr4	20283434	20285410	Ser/Thr protein phosphatase family protein, putative, expressed	0.070551	0.860177
428	FW	qFW4-1	LOC_Os04g33540	Chr4	20286090	20286971	expressed protein	0	0.014566
429	FW	qFW4-1	LOC_Os04g33550	Chr4	20290889	20291393	expressed protein	0	0
430	FW	qFW4-1	LOC_Os04g33560	Chr4	20304563	20306181	expressed protein	0.088295	1.39333
431	FW	qFW4-1	LOC_Os04g33570	Chr4	20319029	20321514	RCN4 Centroradialis-like1 homologous to TFL1 gene; contains Pfam profile PF01161: Phosphatidylethanolamine-binding protein, expressed	0.0792935	0.076555
432	FW	qFW4-1	LOC_Os04g33580	Chr4	20327397	20328404	insoluble protein, putative, expressed	0	0.0988475
433	FW	qFW4-1	LOC_Os04g33590	Chr4	20338877	20345067	hydrolase, alpha/beta fold family protein, putative, expressed	6.57008	5.13851
434	FW	qFW4-1	LOC_Os04g33600	Chr4	20348436	20353555	hydrolase, alpha/beta fold family protein, putative, expressed	3.30759	3.83104
435	FW	qFW4-1	LOC_Os04g33610	Chr4	20358377	20359628	expressed protein	6.54823	6.21398
436	FW	qFW4-1	LOC_Os04g33620	Chr4	20364171	20364754	expressed protein	0.074231	0.099524
437	FW	qFW4-1	LOC_Os04g33630	Chr4	20365611	20369229	2Fe-2S iron-sulfur cluster binding domain containing protein, expressed	3.09555	28.622
438	FW	qFW4-1	LOC_Os04g33640	Chr4	20372913	20377959	glycosyl hydrolases family 17, putative, expressed	3.17986	1.70162
439	FW	qFW4-1	LOC_Os04g33650	Chr4	20380910	20383986	expressed protein	1.70755	0.223191
440	FW	qFW4-1	LOC_Os04g33660	Chr4	20387715	20390008	bifunctional monodehydroascorbate reductase and carbonic anhydrasenectarin-3 precursor, putative, expressed	23.9899	19.3324
441	FW	qFW4-1	LOC_Os04g33670	Chr4	20391986	20393086	expressed protein	0.0745265	0.606735
442	FW	qFW4-1	LOC_Os04g33680	Chr4	20393546	20395294	glutaredoxin, putative, expressed	0.077266	0.43154
443	FW	qFW4-1	LOC_Os04g33690	Chr4	20398093	20405810	sec23/Sec24 trunk domain containing protein, expressed	2.80064	9.59606
444	FW	qFW4-1	LOC_Os04g33700	Chr4	20406006	20410406	ABC transmembrane transporter domain containing protein, expressed	1.4214	1.61639
445	FW	qFW4-1	LOC_Os04g33710	Chr4	20411176	20411922	expressed protein	0.056739	0.031089
446	FW	qFW4-1	LOC_Os04g33720	Chr4	20412315	20415242	glycosyl hydrolases, putative, expressed	0.00156	0.021796
447	FW	qFW4-1	LOC_Os04g33740	Chr4	20422171	20427062	glycosyl hydrolases, putative, expressed	0	3.19229
448	FW	qFW4-1	LOC_Os04g33760	Chr4	20443290	20444654	DUF584 domain containing protein, putative, expressed	1.07039	1.03046
449	FW	qFW4-1	LOC_Os04g33770	Chr4	20446867	20451155	nucleoside-diphosphate-sugar epimerase, putative, expressed	0.97522	1.65806
450	FW	qFW4-1	LOC_Os04g33780	Chr4	20457921	20463115	OTU-like cysteine protease family protein, putative, expressed	32.4748	25.3335
451	FW	qFW4-1	LOC_Os04g33790	Chr4	20466208	20469276	expressed protein	0	0
452	FW	qFW4-1	LOC_Os04g33800	Chr4	20470407	20474848	retrotransposon protein, putative, unclassified, expressed	0	0
453	FW	qFW4-1	LOC_Os04g33810	Chr4	20484158	20485720	RNA recognition motif containing protein, putative, expressed	6.30513	2.77112
454	FW	qFW4-1	LOC_Os04g33820	Chr4	20485788	20487086	OsFBX132 - F-box domain containing protein, expressed	0.294456	0.266826
455	FW	qFW4-1	LOC_Os04g33830	Chr4	20495975	20497051	membrane protein, putative, expressed	440.259	1186.63
456	FW	qFW4-1	LOC_Os04g33840	Chr4	20499421	20501058	pentatricopeptide, putative, expressed	1.64839	1.82705
457	FW	qFW4-1	LOC_Os04g33860	Chr4	20508616	20509616	expressed protein	10.1596	8.81929
458	FW	qFW4-1	LOC_Os04g33870	Chr4	20519152	20520509	DUF623 domain containing protein, expressed	0.143759	0.076065
459	FW	qFW4-1	LOC_Os04g33880	Chr4	20526065	20528257	HVA22, putative, expressed	5.18845	18.9142
460	FW	qFW4-1	LOC_Os04g33885	Chr4	20528785	20530320	expressed protein	0.675738	0.366558
461	FW	qFW4-1	LOC_Os04g33890	Chr4	20530791	20531315	expressed protein	0	0
462	FW	qFW4-1	LOC_Os04g33900	Chr4	20534071	20534774	ctr copper transporter family protein, putative, expressed	1.31691	15.6021
463	FW	qFW4-1	LOC_Os04g33910	Chr4	20535948	20538991	expressed protein	0.0200025	0.169616
464	FW	qFW4-1	LOC_Os04g33920	Chr4	20543121	20544485	LTPL102 - Protease inhibitor/seed storage/LTP family protein precursor, expressed	0.462995	0.094773
465	FW	qFW4-1	LOC_Os04g33930	Chr4	20547166	20548477	LTPL103 - Protease inhibitor/seed storage/LTP family protein precursor, expressed	0.0638285	0.01507
466	FW	qFW4-1	LOC_Os04g33940	Chr4	20548855	20550959	protein of unknown function DUF1279 domain containing protein, expressed	32.3011	19.7235
467	FW	qFW4-1	LOC_Os04g33950	Chr4	20549573	20555304	E2F family transcription factor protein, putative, expressed	10.7842	12.9616
468	FW	qFW4-1	LOC_Os04g33960	Chr4	20557233	20558527	expressed protein
469	FW	qFW4-1	LOC_Os04g33970	Chr4	20559966	20564907	2-Cys peroxiredoxin BAS1, chloroplast precursor, putative, expressed	6.25025	4.02062
470	FW	qFW4-1	LOC_Os04g33980	Chr4	20567850	20571227	transposon protein, putative, Mutator sub-class, expressed	0.938784	0.446192
471	FW	qFW4-1	LOC_Os04g33990	Chr4	20579349	20580533	harpin-induced protein 1 domain containing protein, expressed	4.10764	98.7913
472	FW	qFW4-1	LOC_Os04g34000	Chr4	20587018	20593240	digalactosyldiacylglycerol synthase, chloroplast precursor, putative, expressed	3.81645	2.59586
473	FW	qFW4-1	LOC_Os04g34010	Chr4	20592808	20596141	aluminum-activated malate transporter, putative, expressed	0.328623	0.295485
474	FW	qFW4-1	LOC_Os04g34020	Chr4	20606542	20606865	retrotransposon protein, putative, Ty3-gypsy subclass	0	0
475	FW	qFW4-1	LOC_Os04g34030	Chr4	20610145	20611500	U-box domain-containing protein, putative, expressed	0.0337935	0.0071375
476	FW	qFW4-1	LOC_Os04g34040	Chr4	20617621	20621354	hypothetical protein	0	0
477	FW	qFW4-1	LOC_Os04g34050	Chr4	20624598	20625919	VQ domain containing protein, putative, expressed	1.30963	0.751132
478	FW	qFW4-1	LOC_Os04g34060	Chr4	20627581	20628087	expressed protein	0	0
479	FW	qFW4-1	LOC_Os04g34070	Chr4	20630032	20634254	retrotransposon protein, putative, Ty1-copia subclass, expressed	0	0
480	FW	qFW4-1	LOC_Os04g34080	Chr4	20640334	20645392	WD-40 repeat family protein, putative, expressed	6.72322	6.07436
481	FW	qFW4-1	LOC_Os04g34090	Chr4	20651877	20652795	expressed protein	0.036741	0
482	FW	qFW7-1	LOC_Os07g34120	Chr7	20404388	20406113	transposon protein, putative, unclassified, expressed	0.016402	0.027567
483	FW	qFW7-1	LOC_Os07g34130	Chr7	20410551	20418589	TBC domain containing protein, expressed	1.45007	0.002419
484	FW	qFW7-1	LOC_Os07g34140	Chr7	20420138	20421516	chalcone synthase, putative, expressed	0.062262	0
485	FW	qFW7-1	LOC_Os07g34150	Chr7	20427642	20432505	transposon protein, putative, CACTA, En/Spm sub-class, expressed	0	0
486	FW	qFW7-1	LOC_Os07g34160	Chr7	20434103	20437434	transposon protein, putative, CACTA, En/Spm sub-class, expressed	0.00629	0.00716
487	FW	qFW7-1	LOC_Os07g34170	Chr7	20449001	20450344	alpha/beta hydrolase fold, putative, expressed	0.124266	0.0143345
488	FW	qFW7-1	LOC_Os07g34180	Chr7	20452898	20453215	expressed protein	0	0
489	FW	qFW7-1	LOC_Os07g34190	Chr7	20455512	20456848	chalcone and stilbene synthases, putative, expressed	0.130452	0.0371545
490	FW	qFW7-1	LOC_Os07g34200	Chr7	20458075	20461772	transposon protein, putative, CACTA, En/Spm sub-class, expressed	0.003439	0.0011635
491	FW	qFW7-1	LOC_Os07g34210	Chr7	20464957	20468289	transposon protein, putative, CACTA, En/Spm sub-class, expressed	0.00158	0.03059
492	FW	qFW7-1	LOC_Os07g34220	Chr7	20477074	20478169	expressed protein	0	1.39621
493	FW	qFW7-1	LOC_Os07g34230	Chr7	20479384	20481828	transposon protein, putative, unclassified, expressed	0.00751	0.017021
494	FW	qFW7-1	LOC_Os07g34240	Chr7	20485027	20486346	gibberellin receptor, putative, expressed	0.070426	0.004106
495	FW	qFW7-1	LOC_Os07g34250	Chr7	20498983	20503162	peptidase aspartic family protein, putative, expressed	0.247629	0.375623
496	FW	qFW7-1	LOC_Os07g34260	Chr7	20504681	20506402	chalcone and stilbene synthases, putative, expressed	0.402098	2.75004
497	FW	qFW7-1	LOC_Os07g34270	Chr7	20516179	20517922	expressed protein	0.079448	0.160967
498	FW	qFW7-1	LOC_Os07g34280	Chr7	20523736	20525356	CXE carboxylesterase, putative, expressed	0.064426	0.047197
499	FW	qFW7-1	LOC_Os07g34290	Chr7	20535855	20536812	expressed protein	0.105715	0.112279
500	FW	qFW7-1	LOC_Os07g34300	Chr7	20546111	20548691	retrotransposon protein, putative, unclassified	0.00689	0
501	FW	qFW7-1	LOC_Os07g34310	Chr7	20551593	20559145	transposon protein, putative, unclassified, expressed	0.001658	0.010283
502	FW	qFW7-1	LOC_Os07g34320	Chr7	20562482	20567659	nodulin, putative, expressed	0.046396	1.34521
503	FW	qFW7-1	LOC_Os07g34330	Chr7	20571279	20571560	expressed protein	0	0.0726015
504	FW	qFW7-1	LOC_Os07g34340	Chr7	20584186	20586990	conserved hypothetical protein	0.026279	0
505	FW	qFW7-1	LOC_Os07g34350	Chr7	20588049	20588712	retrotransposon protein, putative, unclassified	0	0
506	FW	qFW7-1	LOC_Os07g34360	Chr7	20590074	20591104	expressed protein	0.019007	0
507	FW	qFW7-1	LOC_Os07g34370	Chr7	20596752	20600204	gibberellin receptor, putative, expressed	0.0140185	0.0182475
508	FW	qFW7-1	LOC_Os07g34380	Chr7	20602661	20604043	hypothetical protein	0.156485	0
509	FW	qFW7-1	LOC_Os07g34390	Chr7	20615714	20620597	ankyrin repeat family protein, putative, expressed	4.02639	5.71735
510	FW	qFW7-1	LOC_Os07g34400	Chr7	20625091	20626687	lipase class 3 family protein, putative, expressed	0	0
511	FW	qFW7-1	LOC_Os07g34410	Chr7	20641499	20645898	retrotransposon protein, putative, unclassified, expressed	0.016334	0
512	FW	qFW7-1	LOC_Os07g34420	Chr7	20646985	20647605	lipase class 3 family protein, putative, expressed	0	0
513	FW	qFW7-1	LOC_Os07g34430	Chr7	20650302	20651020	expressed protein	0	0
514	FW	qFW7-1	LOC_Os07g34440	Chr7	20652247	20654046	lipase class 3 family protein, putative, expressed	0.024868	0
515	FW	qFW7-1	LOC_Os07g34450	Chr7	20656726	20659834	transposon protein, putative, CACTA, En/Spm sub-class, expressed	0.003845	0.009876
516	FW	qFW7-1	LOC_Os07g34460	Chr7	20661645	20663282	transposon protein, putative, unclassified, expressed	0.0125555	0.0089015
517	FW	qFW7-1	LOC_Os07g34470	Chr7	20665039	20665632	retrotransposon protein, putative, unclassified	0	0.0001125
518	FW	qFW7-1	LOC_Os07g34480	Chr7	20667892	20670704	retrotransposon protein, putative, Ty3-gypsy subclass	0.005192	0.126097
519	FW	qFW7-1	LOC_Os07g34490	Chr7	20672256	20673081	retrotransposon protein, putative, unclassified, expressed	0.021881	0.157775
520	FW	qFW7-1	LOC_Os07g34500	Chr7	20674452	20677546	transposon protein, putative, CACTA, En/Spm sub-class	0	0
521	FW	qFW7-1	LOC_Os07g34510	Chr7	20681154	20690967	retrotransposon protein, putative, unclassified, expressed	2.28419	2.75799
522	FW	qFW7-1	LOC_Os07g34520	Chr7	20691054	20693694	isocitrate lyase, putative, expressed	1.75374	0.0388625
523	FW	qFW7-1	LOC_Os07g34529	Chr7	20702213	20705816	expressed protein	0.001668	0.000122
524	FW	qFW7-1	LOC_Os07g34540	Chr7	20707355	20708661	hypothetical protein	0	0
525	FW	qFW7-1	LOC_Os07g34550	Chr7	20713368	20717428	retrotransposon protein, putative, unclassified, expressed	0	0.000477
526	FW	qFW7-1	LOC_Os07g34560	Chr7	20720944	20721234	expressed protein
527	FW	qFW7-1	LOC_Os07g34570	Chr7	20724563	20726098	FAD dependent oxidoreductase domain containing protein, expressed	70.6644	1187.18
528	FW	qFW7-1	LOC_Os07g34580	Chr7	20729406	20731418	glycosyl hydrolases family 16, putative, expressed	0.188061	5.11903
529	FW	qFW7-1	LOC_Os07g34589	Chr7	20733146	20735347	translation initiation factor SUI1, putative, expressed	1029.62	1063.84
530	FW	qFW7-1	LOC_Os07g34598	Chr7	20739506	20749461	tyrosyl-DNA phosphodiesterase 1, putative, expressed	0.684929	3.87991
531	FW	qFW7-1	LOC_Os07g34610	Chr7	20749666	20751833	oral cancer overexpressed protein 1, putative, expressed	16.3096	8.50087
532	FW	qFW7-1	LOC_Os07g34620	Chr7	20752215	20754511	expressed protein	0.881202	0.447932
533	FW	qFW7-1	LOC_Os07g34630	Chr7	20762022	20762801	expressed protein	0	0
534	FW	qFW7-1	LOC_Os07g34640	Chr7	20764652	20769585	pyruvate Pi dikinase regulatory protein, putative, expressed	24.4596	17.7537
535	FW	qFW7-1	LOC_Os07g34650	Chr7	20768395	20772350	expressed protein	14.4488	10.4271
536	FW	qFW7-1	LOC_Os07g34660	Chr7	20780832	20781137	expressed protein	0	0
537	FW	qFW7-1	LOC_Os07g34670	Chr7	20783031	20784716	peroxidase precursor, putative, expressed	0	0.0019045
538	FW	qFW7-1	LOC_Os07g34680	Chr7	20785505	20786384	expressed protein	0	0
539	FW	qFW7-1	LOC_Os07g34690	Chr7	20789771	20790707	expressed protein	0	0
540	FW	qFW7-1	LOC_Os07g34700	Chr7	20796081	20797722	retrotransposon protein, putative, unclassified, expressed	0	0
Note: The green fill colors indicate 28 candidate genes that may be highly related to seed vigor. Blue fonts in green fill colors represent 21 candidate genes associated with significant SV-related phenotypic differences between their top two or three haplotypes.The expression data of leaf and seed are obtained from Rice Expression Database (http://expression.ic4r.org/).

## Sheet: Table S4
Supplementary Table 4 The distance to significant SNP of 21 candidate genes.
Gene ID	Near by SNP	Distance to significant SNP (bp)
LOC_Os01g10840	rs1_5889847	111381
LOC_Os01g10870	rs1_5889847	88705
LOC_Os01g10970	rs1_5889847	40902
LOC_Os01g10990	rs1_5889879	26085
LOC_Os01g11150	rs1_5967790	1029
LOC_Os01g11270	rs1_6031005	20
LOC_Os01g11280	rs1_6038556	514
LOC_Os01g11340	rs1_6055857	20831
LOC_Os01g11960	rs1_6429529	88598
LOC_Os01g12130	rs1_6429529	182814
LOC_Os01g53160	rs1_30735752	191562
LOC_Os01g54540	rs1_31506390	136974
LOC_Os01g54570	rs1_31506390	114155
LOC_Os01g54990	rs1_31534121	83046
LOC_Os01g55150	rs1_31754183	23794
LOC_Os01g55240	rs1_31777870	17235
LOC_Os01g55450	rs1_31777870	165658
LOC_Os01g55940	rs1_32139392	81984
LOC_Os01g24010	rs1_13579050	50570
LOC_Os07g34240	rs4_20456553	28474
LOC_Os07g34370	rs7_20602053	1849
